# Supplementary material for: C19-Norditerpenoid Alkaloids from Aconitum szechenyianum and Their Effects on LPS-Activated NO Production
Source: PubMed Central journal article supplement (PMC6273406; doi:10.3390/molecules21091175), 2016-09-03
Supplement: molecules-21-01175-s001.pdf [file molecules-21-01175-s001.pdf]

# Supplementary Materials: C19-Norditerpenoid Alkaloids from *Aconitum szechenyianum* and Their Effects on LPS-Activated NO Production

Fei Wang, Zhenggang Yue, Pei Xie, Li Zhang, Zhen Li, Bei Song, Zhishu Tang and Xiaomei Song

## List of Content

| No. | Content                                                                                                    | Page |
|-----|------------------------------------------------------------------------------------------------------------|------|
| 1   | <b>Figure S1.</b> The HR-ESI-MS spectrum of <b>1</b> (in MeOH).                                            | S2   |
| 2   | <b>Figure S2.</b> The IR spectrum of <b>1</b> (in KBr).                                                    | S3   |
| 3   | <b>Figure S3.</b> The $^1\text{H}$ NMR spectrum of <b>1</b> (400MHz in $\text{CDCl}_3$ ).                  | S4   |
| 4   | <b>Figure S4.</b> The $^{13}\text{C}$ NMR spectrum of <b>1</b> (100MHz in $\text{CDCl}_3$ ).               | S5   |
| 5   | <b>Figure S5.</b> The HSQC spectrum of <b>1</b> (400MHz in $\text{CDCl}_3$ ).                              | S6   |
| 6   | <b>Figure S6.</b> The $^1\text{H}$ - $^1\text{H}$ COSY spectrum of <b>1</b> (400MHz in $\text{CDCl}_3$ ).  | S7   |
| 7   | <b>Figure S7.</b> The HMBC spectrum of <b>1</b> (400MHz in $\text{CDCl}_3$ ).                              | S8   |
| 8   | <b>Figure S8.</b> The ROESY spectrum of <b>1</b> (400MHz in $\text{CDCl}_3$ ).                             | S9   |
| 9   | <b>Figure S9.</b> The HR-ESI-MS spectrum of <b>2</b> (in MeOH).                                            | S10  |
| 10  | <b>Figure S10.</b> The IR spectrum of <b>2</b> (in KBr).                                                   | S11  |
| 11  | <b>Figure S11.</b> The $^1\text{H}$ NMR spectrum of <b>2</b> (400MHz in $\text{CDCl}_3$ ).                 | S12  |
| 12  | <b>Figure S12.</b> The $^{13}\text{C}$ NMR spectrum of <b>2</b> (100MHz in $\text{CDCl}_3$ ).              | S13  |
| 13  | <b>Figure S13.</b> The HSQC spectrum of <b>2</b> (400MHz in $\text{CDCl}_3$ ).                             | S14  |
| 14  | <b>Figure S14.</b> The $^1\text{H}$ - $^1\text{H}$ COSY spectrum of <b>2</b> (400MHz in $\text{CDCl}_3$ ). | S15  |
| 15  | <b>Figure S15.</b> The HMBC spectrum of <b>2</b> (400MHz in $\text{CDCl}_3$ ).                             | S16  |
| 16  | <b>Figure S16.</b> The ROESY spectrum of <b>2</b> (400MHz in $\text{CDCl}_3$ ).                            | S17  |
| 17  | <b>Figure S17.</b> The HR-ESI-MS spectrum of <b>3</b> (in MeOH).                                           | S18  |
| 18  | <b>Figure S18.</b> The IR spectrum of <b>3</b> (in KBr).                                                   | S19  |
| 19  | <b>Figure S19.</b> The $^1\text{H}$ NMR spectrum of <b>3</b> (400MHz in $\text{CDCl}_3$ ).                 | S20  |
| 20  | <b>Figure S20.</b> The $^{13}\text{C}$ NMR spectrum of <b>3</b> (100MHz in $\text{CDCl}_3$ ).              | S21  |
| 21  | <b>Figure S21.</b> The HSQC spectrum of <b>3</b> (400MHz in $\text{CDCl}_3$ ).                             | S22  |
| 22  | <b>Figure S22.</b> The $^1\text{H}$ - $^1\text{H}$ COSY spectrum of <b>3</b> (400MHz in $\text{CDCl}_3$ ). | S23  |
| 23  | <b>Figure S23.</b> The HMBC spectrum of <b>3</b> (400MHz in $\text{CDCl}_3$ ).                             | S24  |
| 24  | <b>Figure S24.</b> The ROESY spectrum of <b>3</b> (400MHz in $\text{CDCl}_3$ ).                            | S25  |

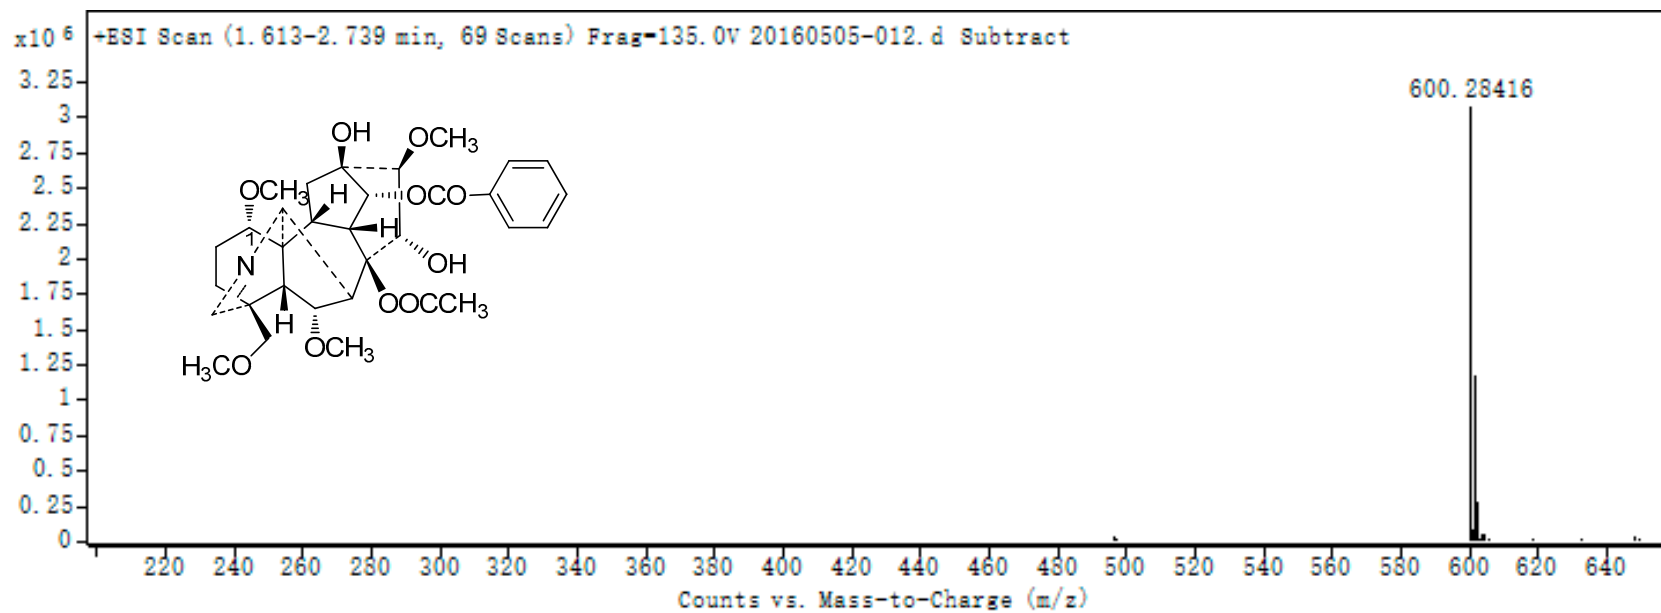

Figure S1. The HR-ESI-MS spectrum of **1** (in MeOH).

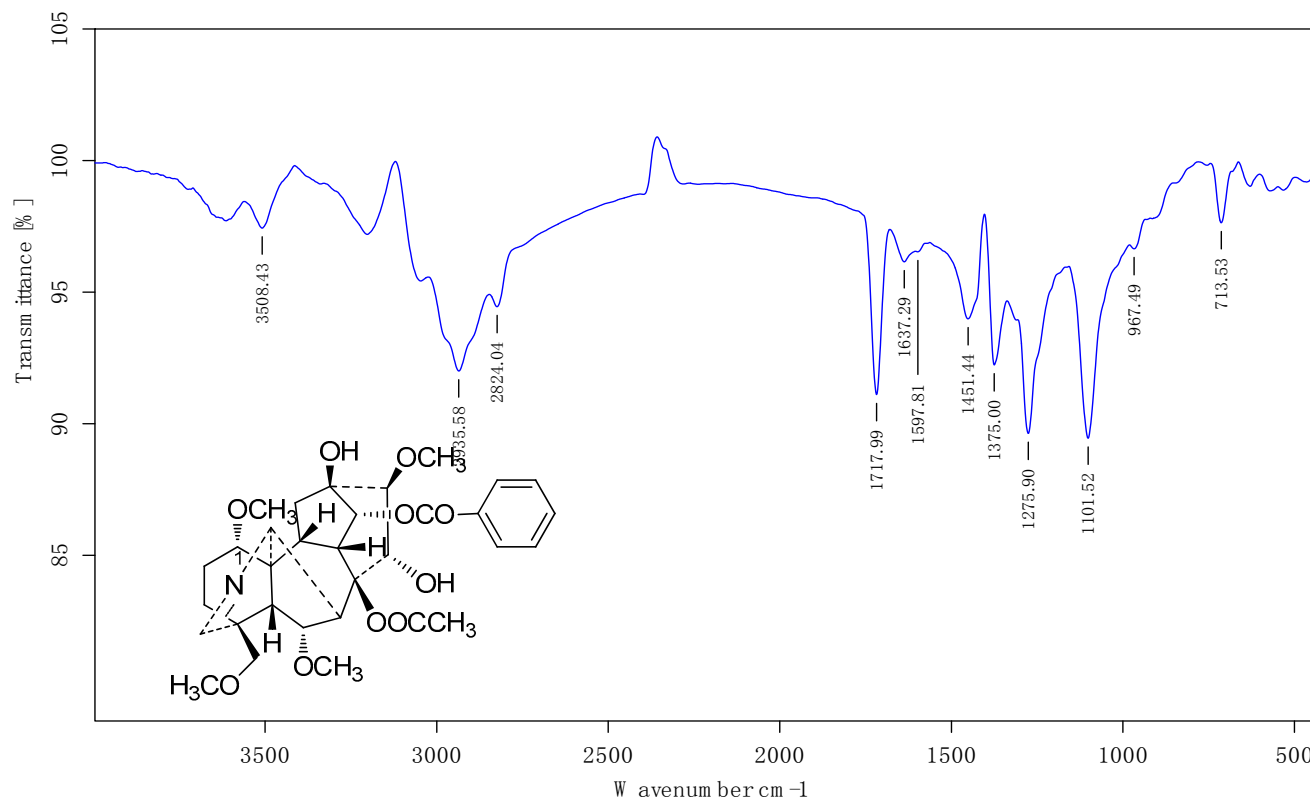

E:\W F\w 1.0

w 1

Instrument type and /or accessory

2016-5-10

Figure S2. The IR spectrum of 1 (in KBr).

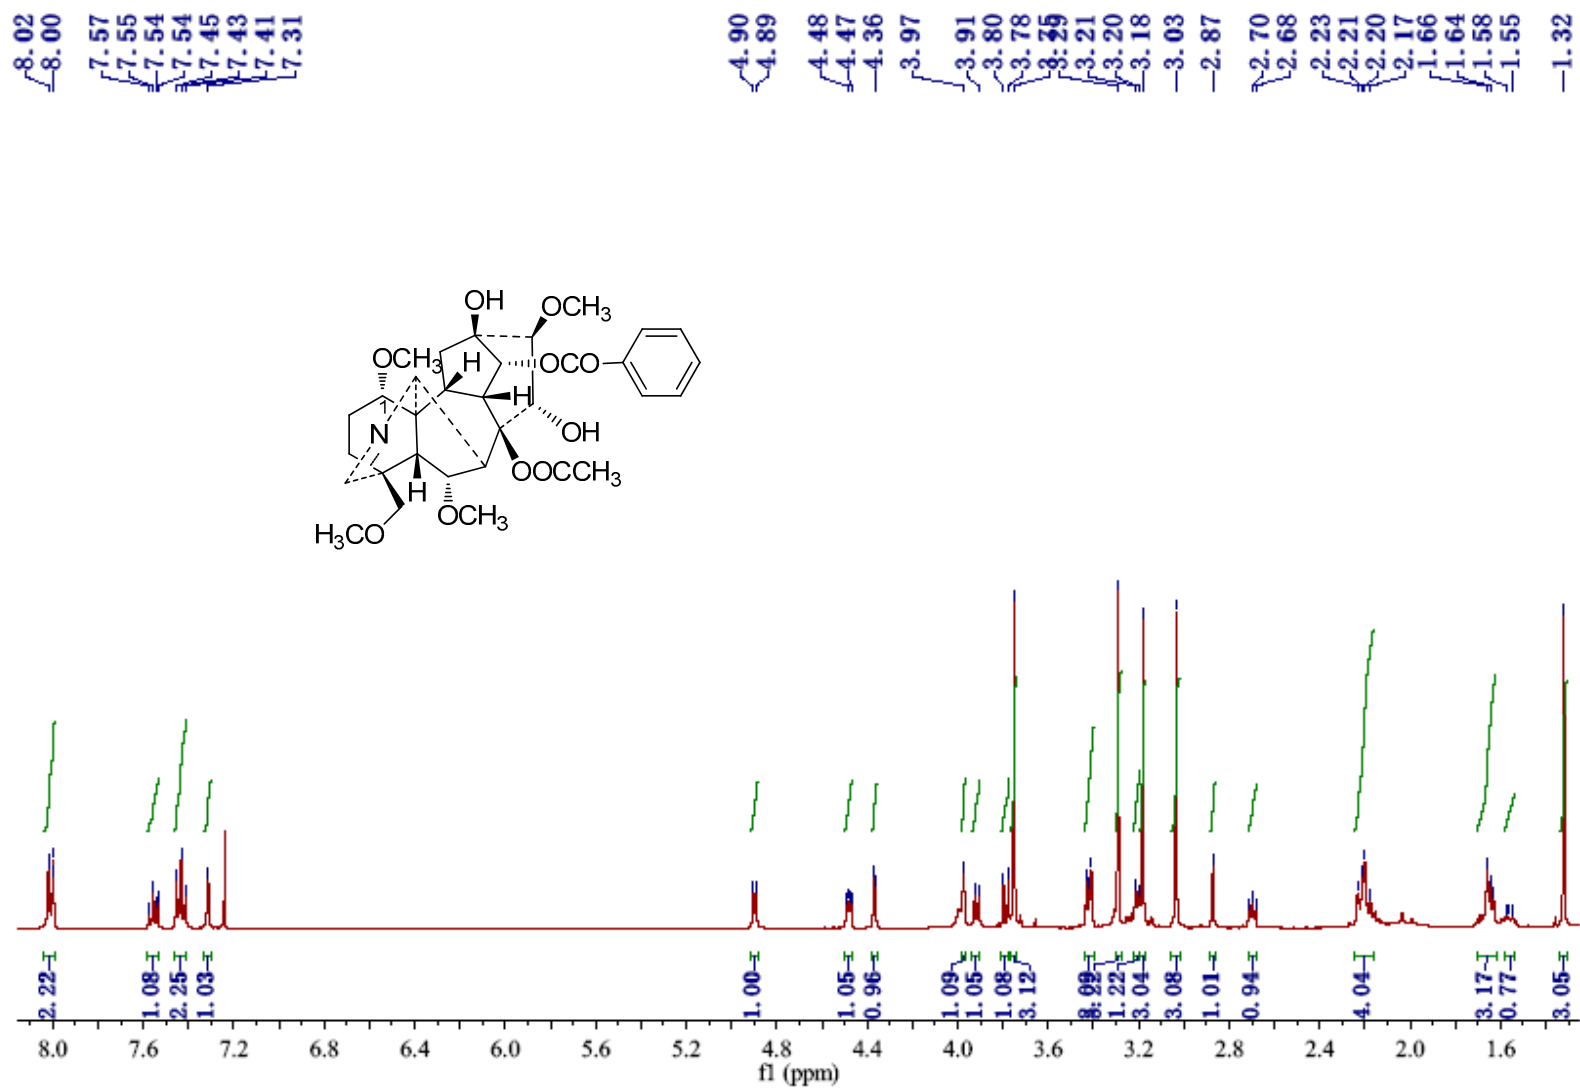Figure S3. The <sup>1</sup>H-NMR spectrum of 1 (400MHz in CDCl<sub>3</sub>).

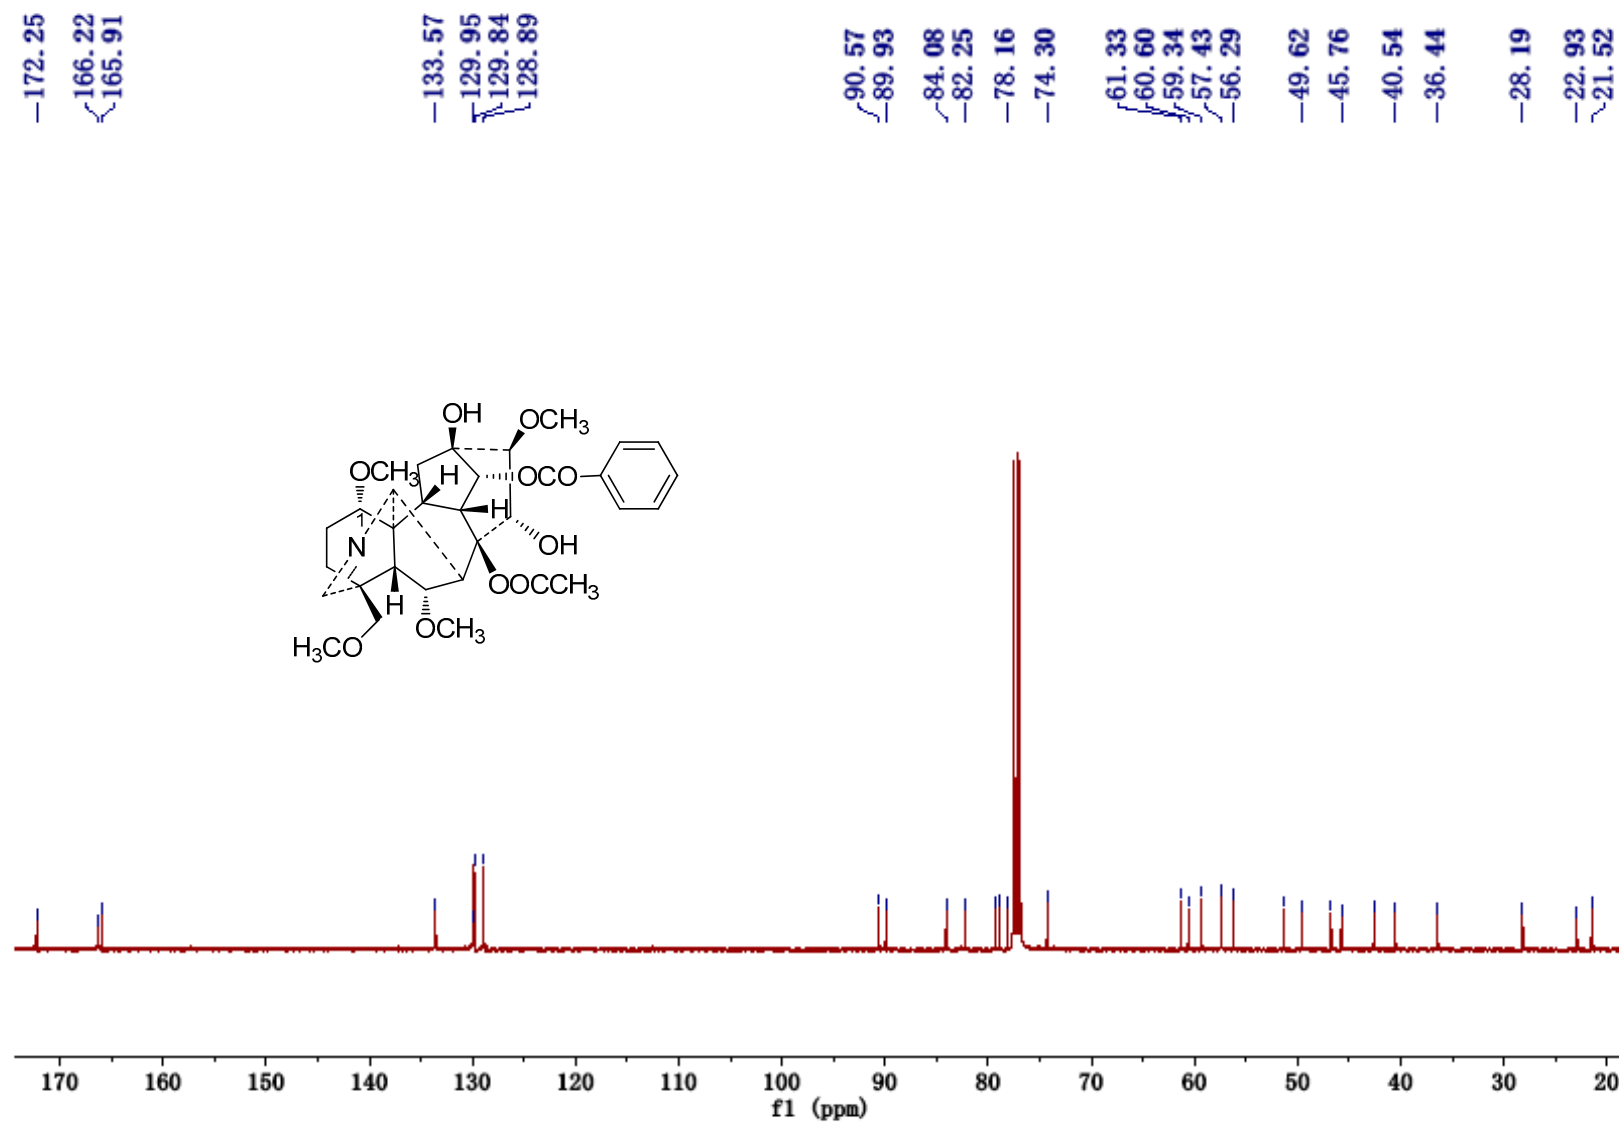Figure S4. The <sup>13</sup>C-NMR spectrum of 1 (100MHz in CDCl<sub>3</sub>).

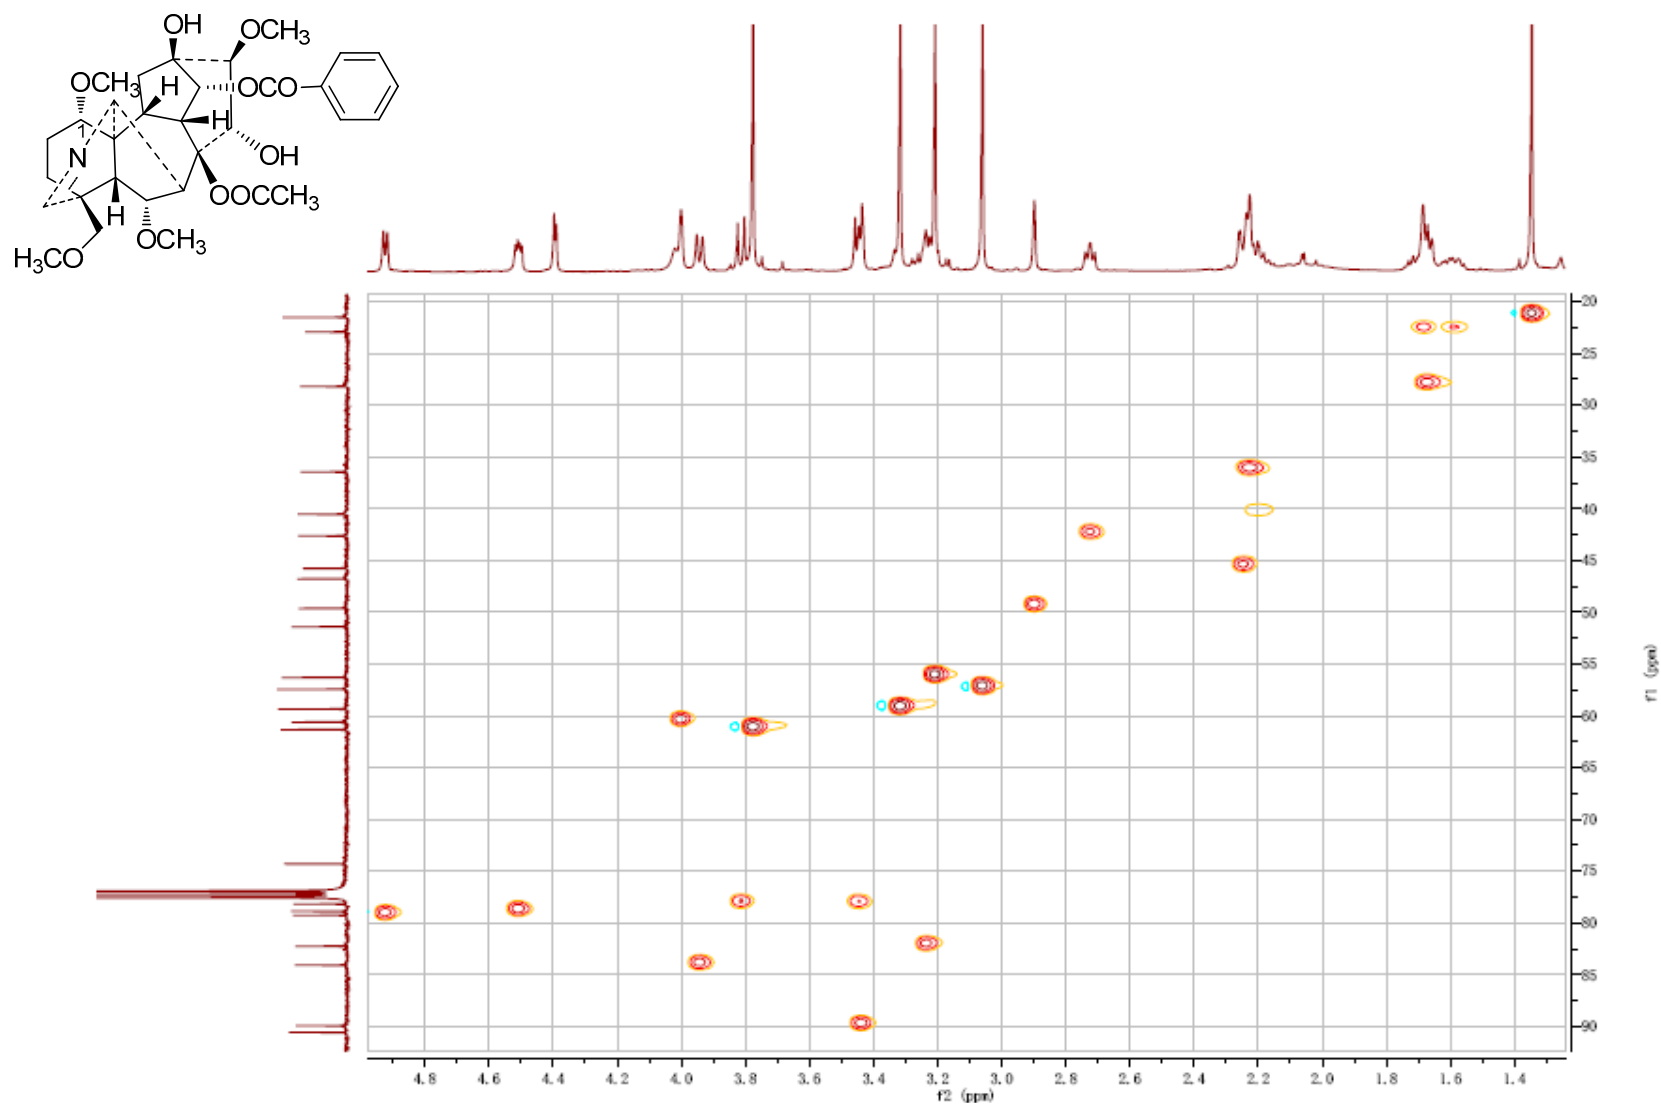

Figure S5. The HSQC spectrum of 1 (400MHz in CDCl<sub>3</sub>).

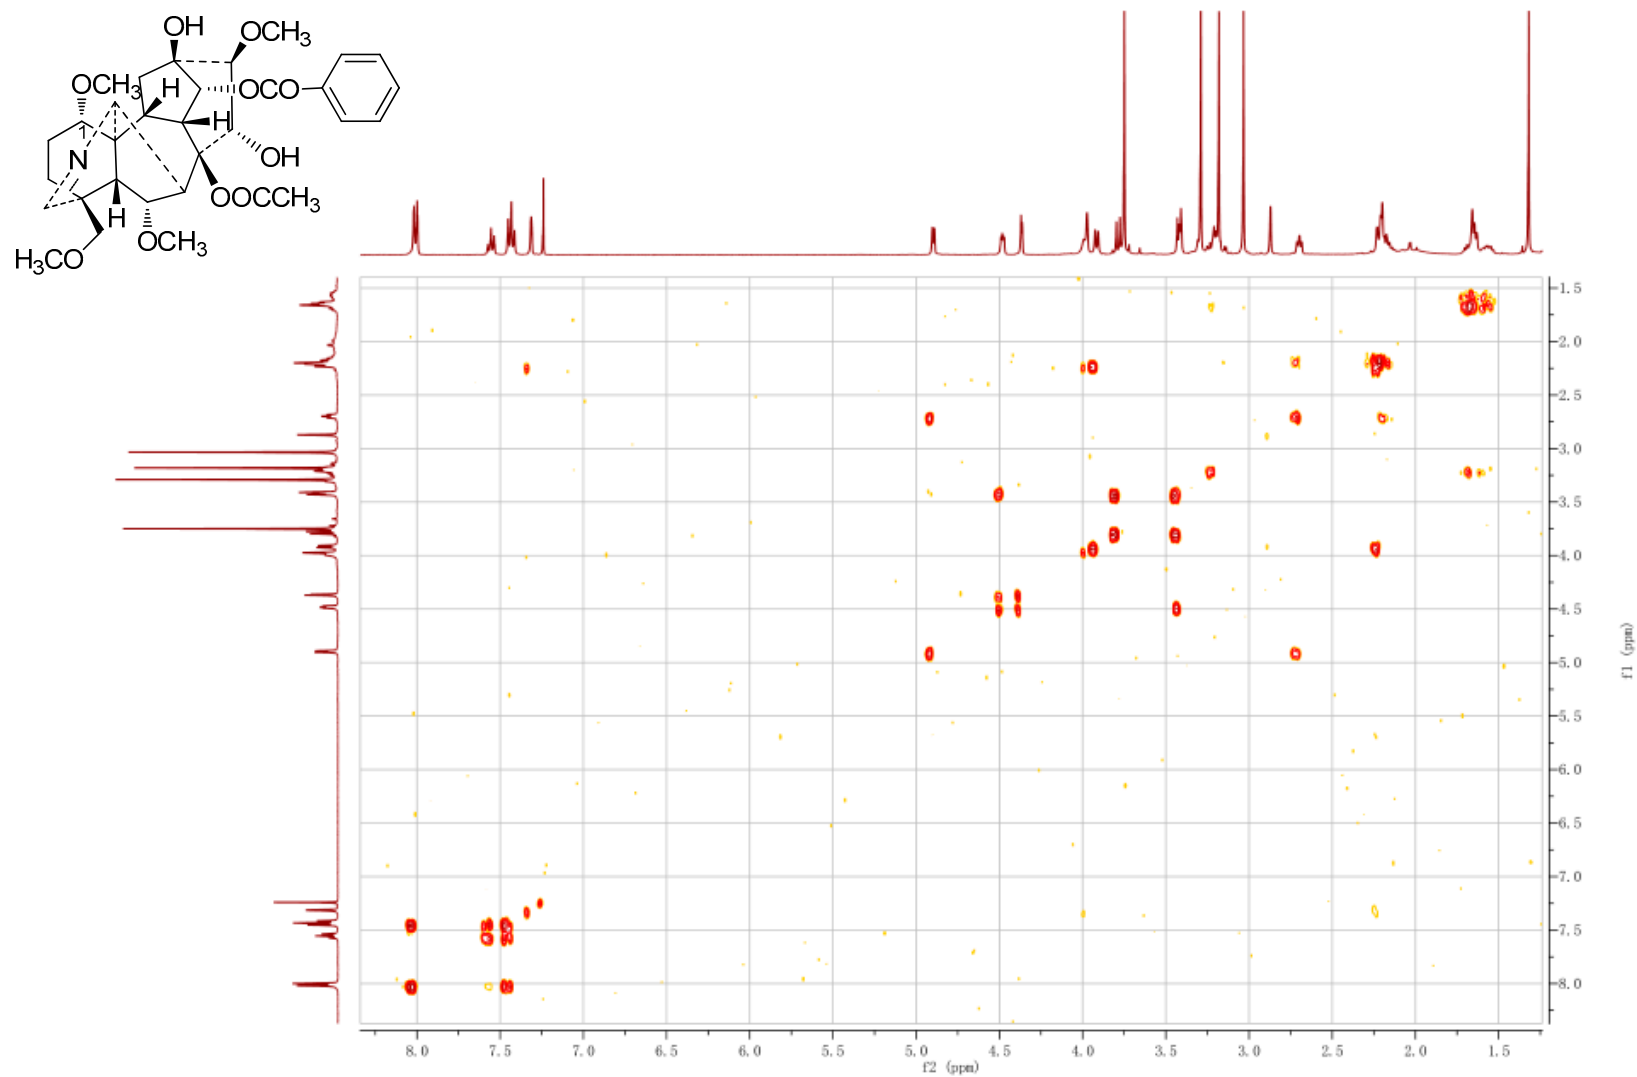

Figure S6. The <sup>1</sup>H-<sup>1</sup>H COSY spectrum of **1** (400MHz in CDCl<sub>3</sub>).

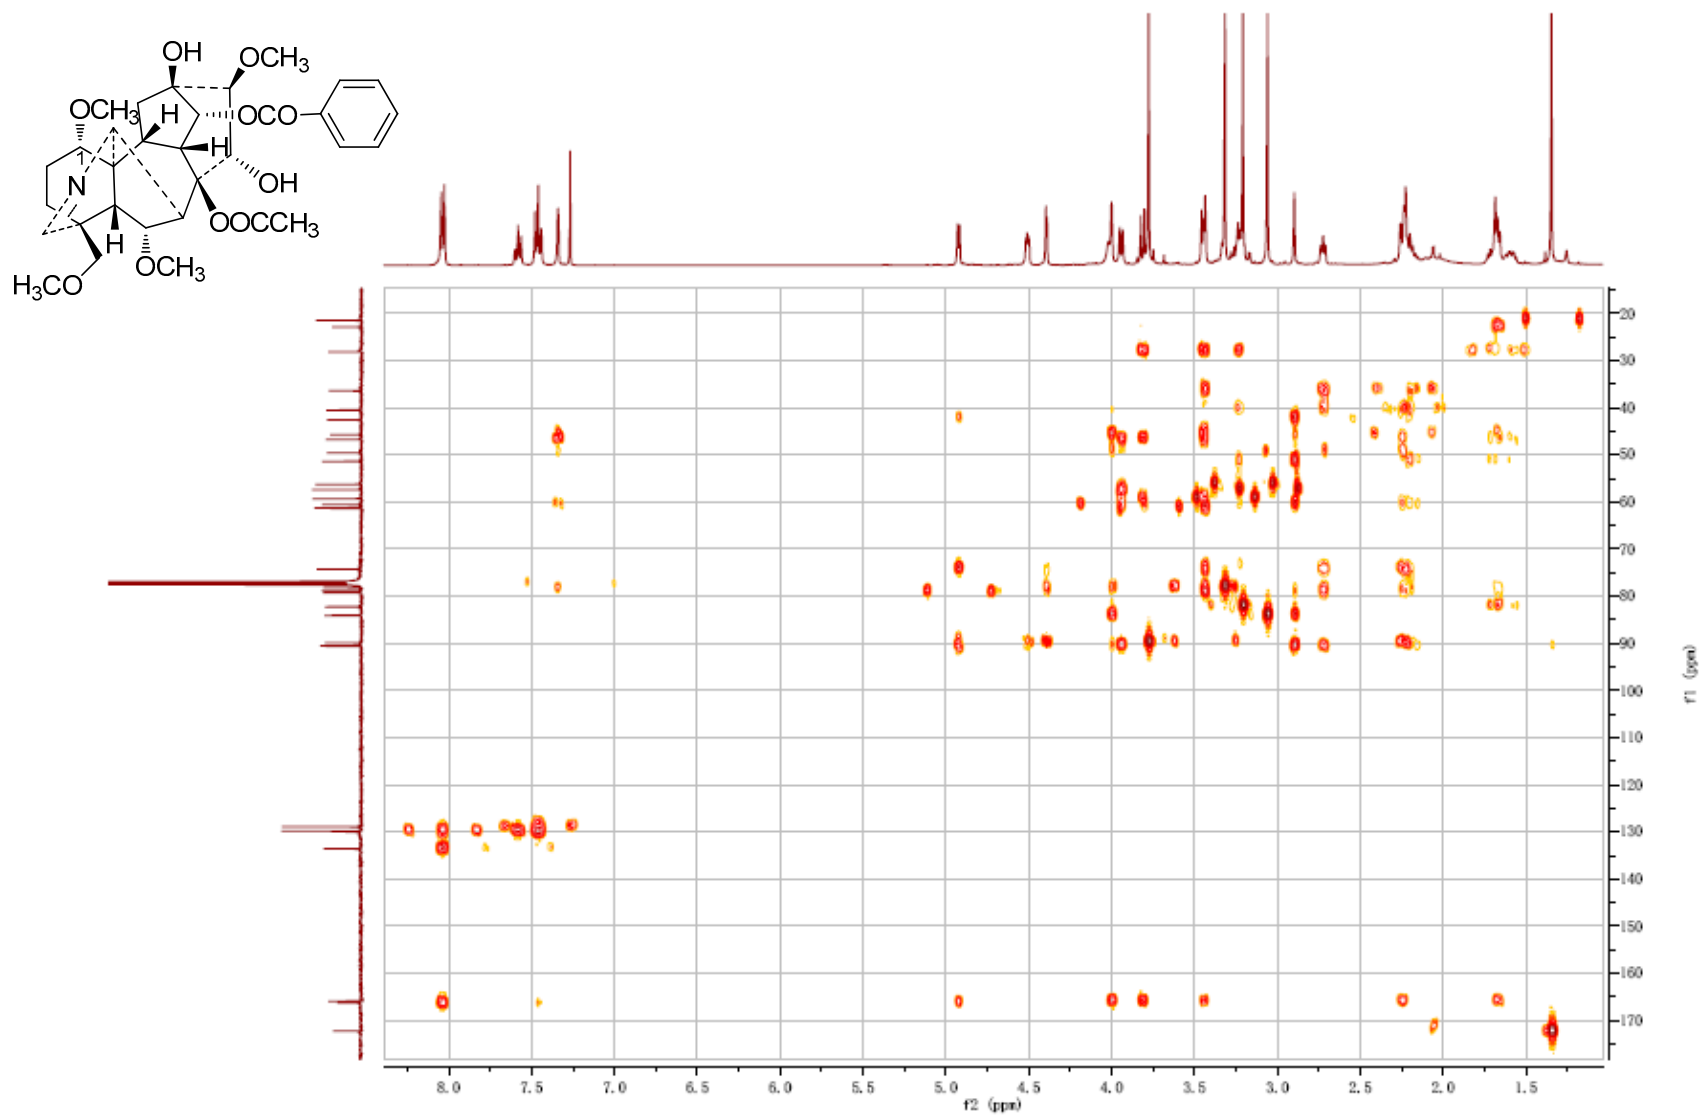Figure S7. The HMBC spectrum of 1 (400MHz in CDCl<sub>3</sub>).



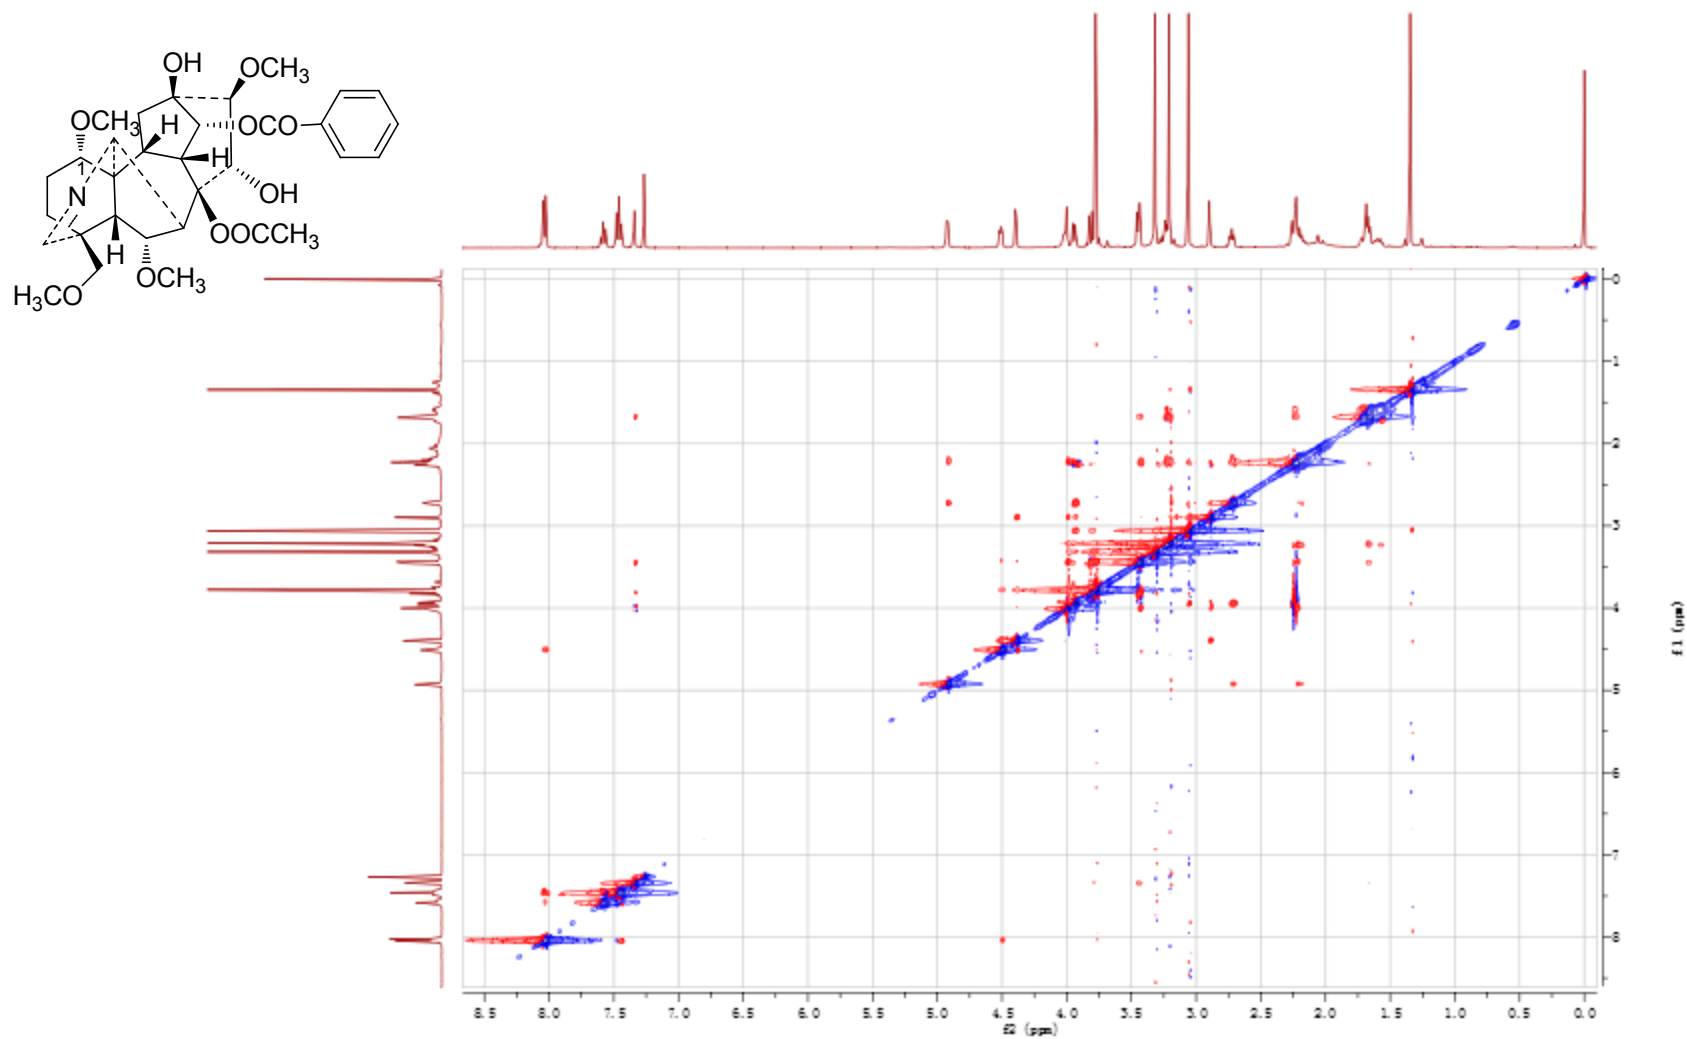

Figure S8. The ROESY spectrum of 1 (400MHz in CDCl<sub>3</sub>).

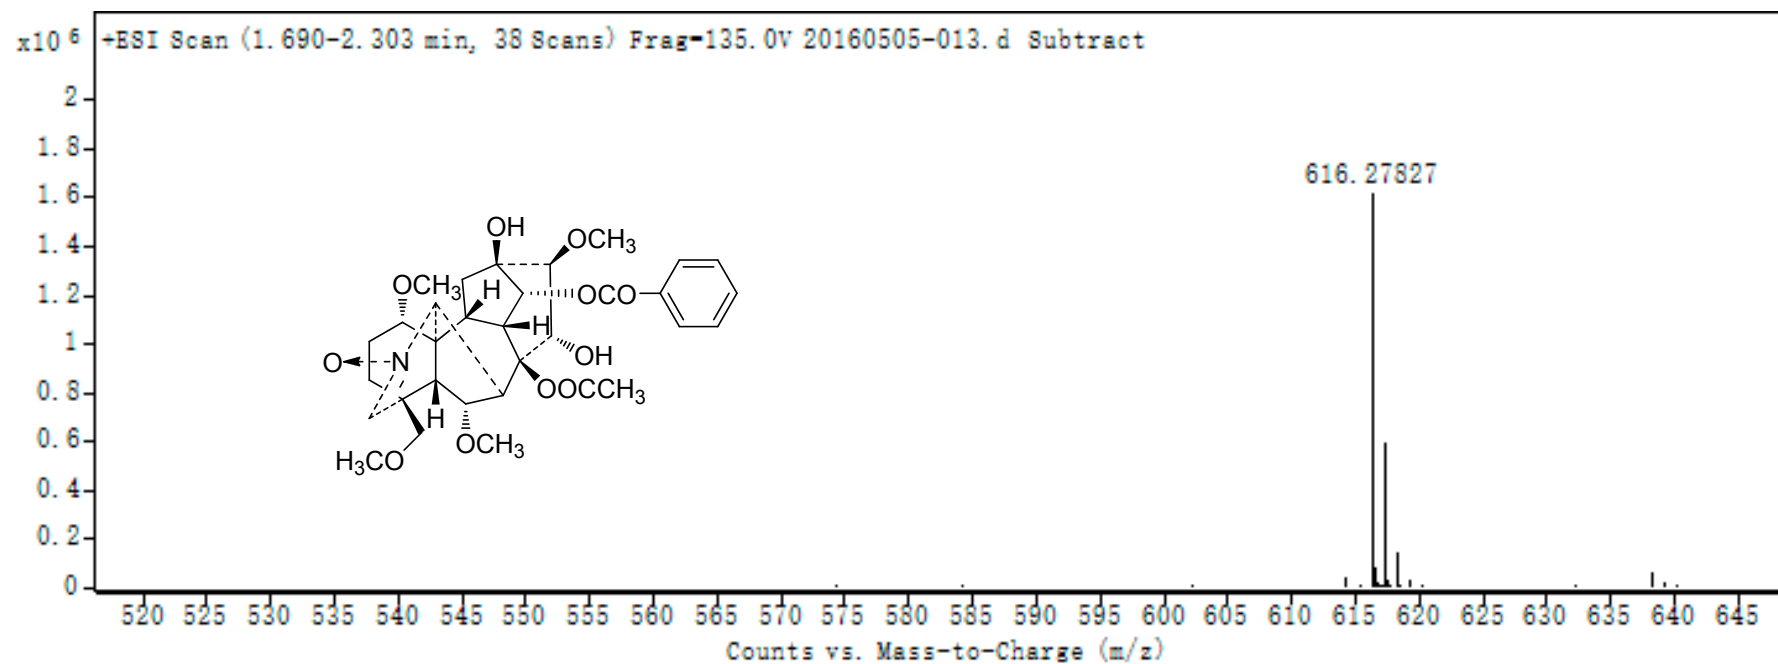

Figure S9. The HR-ESI-MS spectrum of 2 (in MeOH).

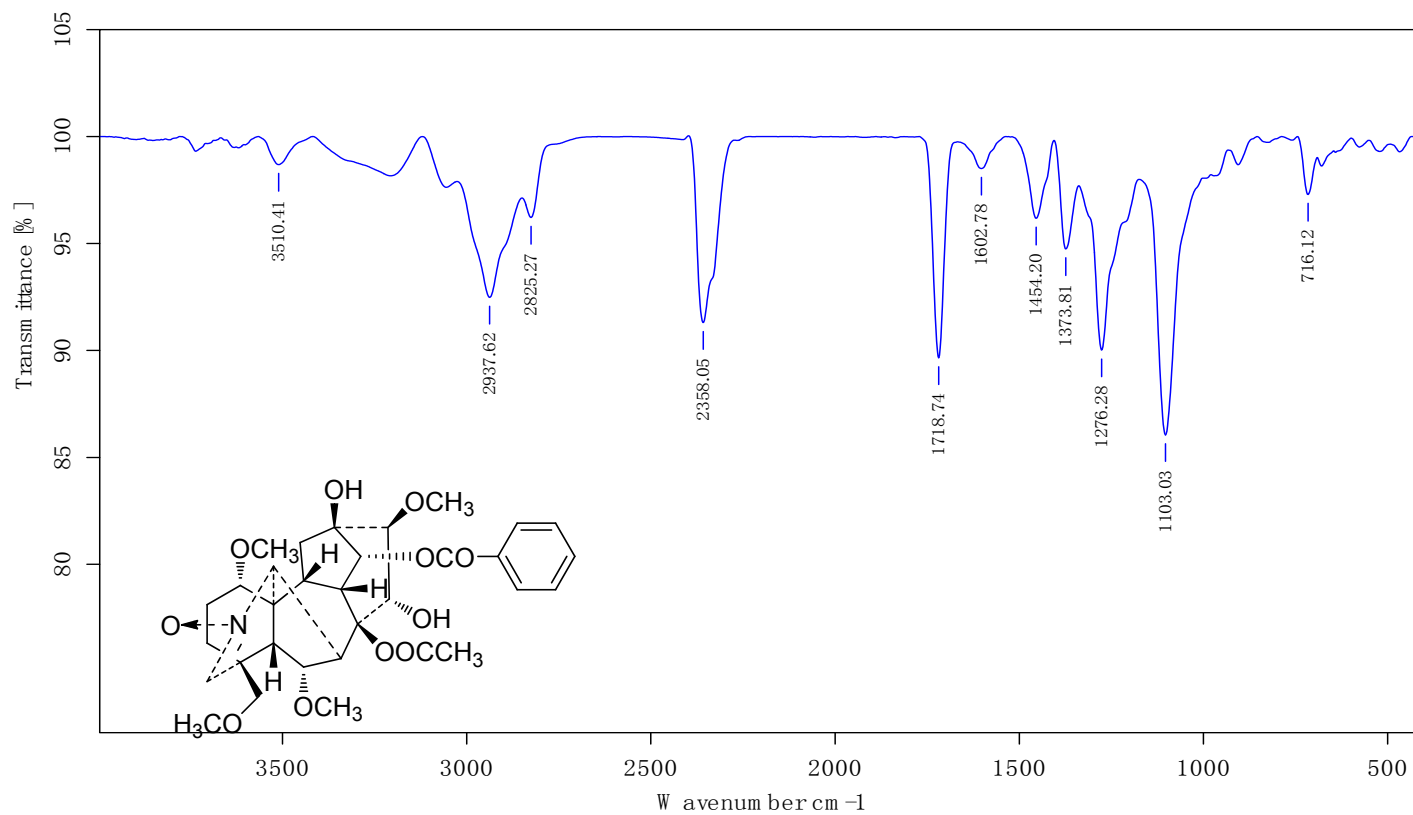

E:\W F\w2.0

kbr

Instument type and /or accessory

2016-5-10

Figure S10. The IR spectrum of 2 (in KBr).

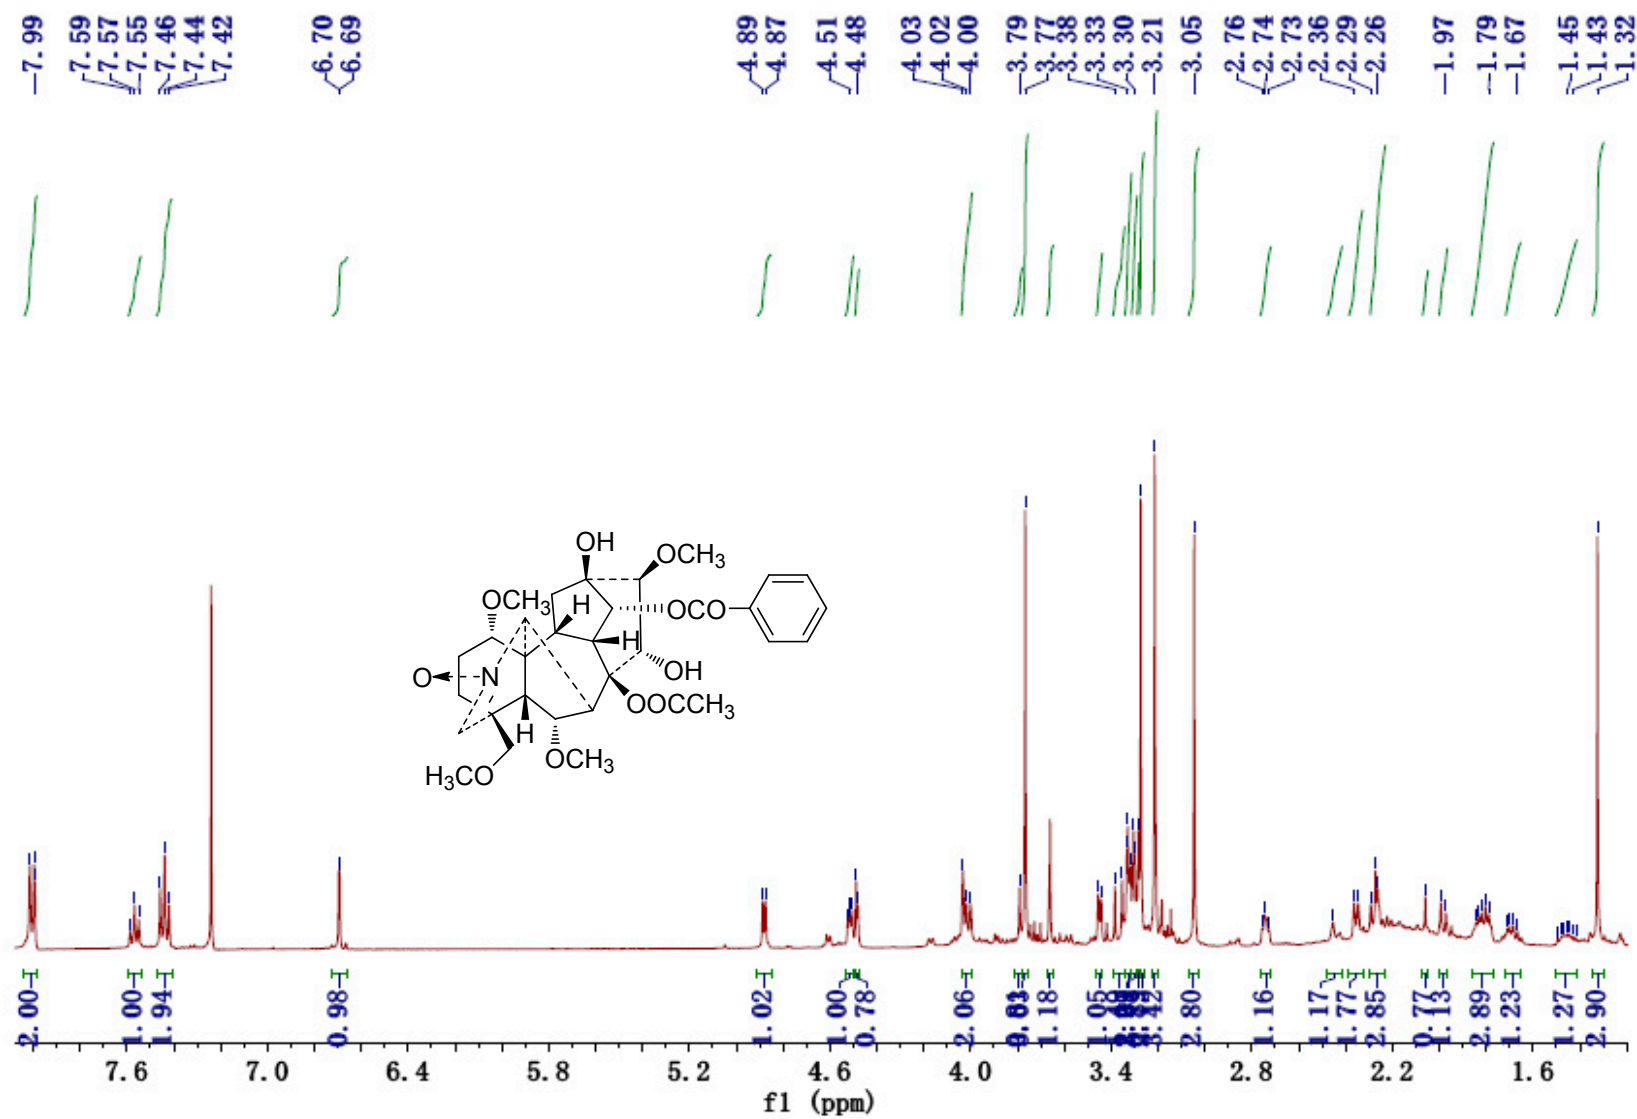Figure S11. The <sup>1</sup>H-NMR spectrum of 2 (400 MHz in CDCl<sub>3</sub>).

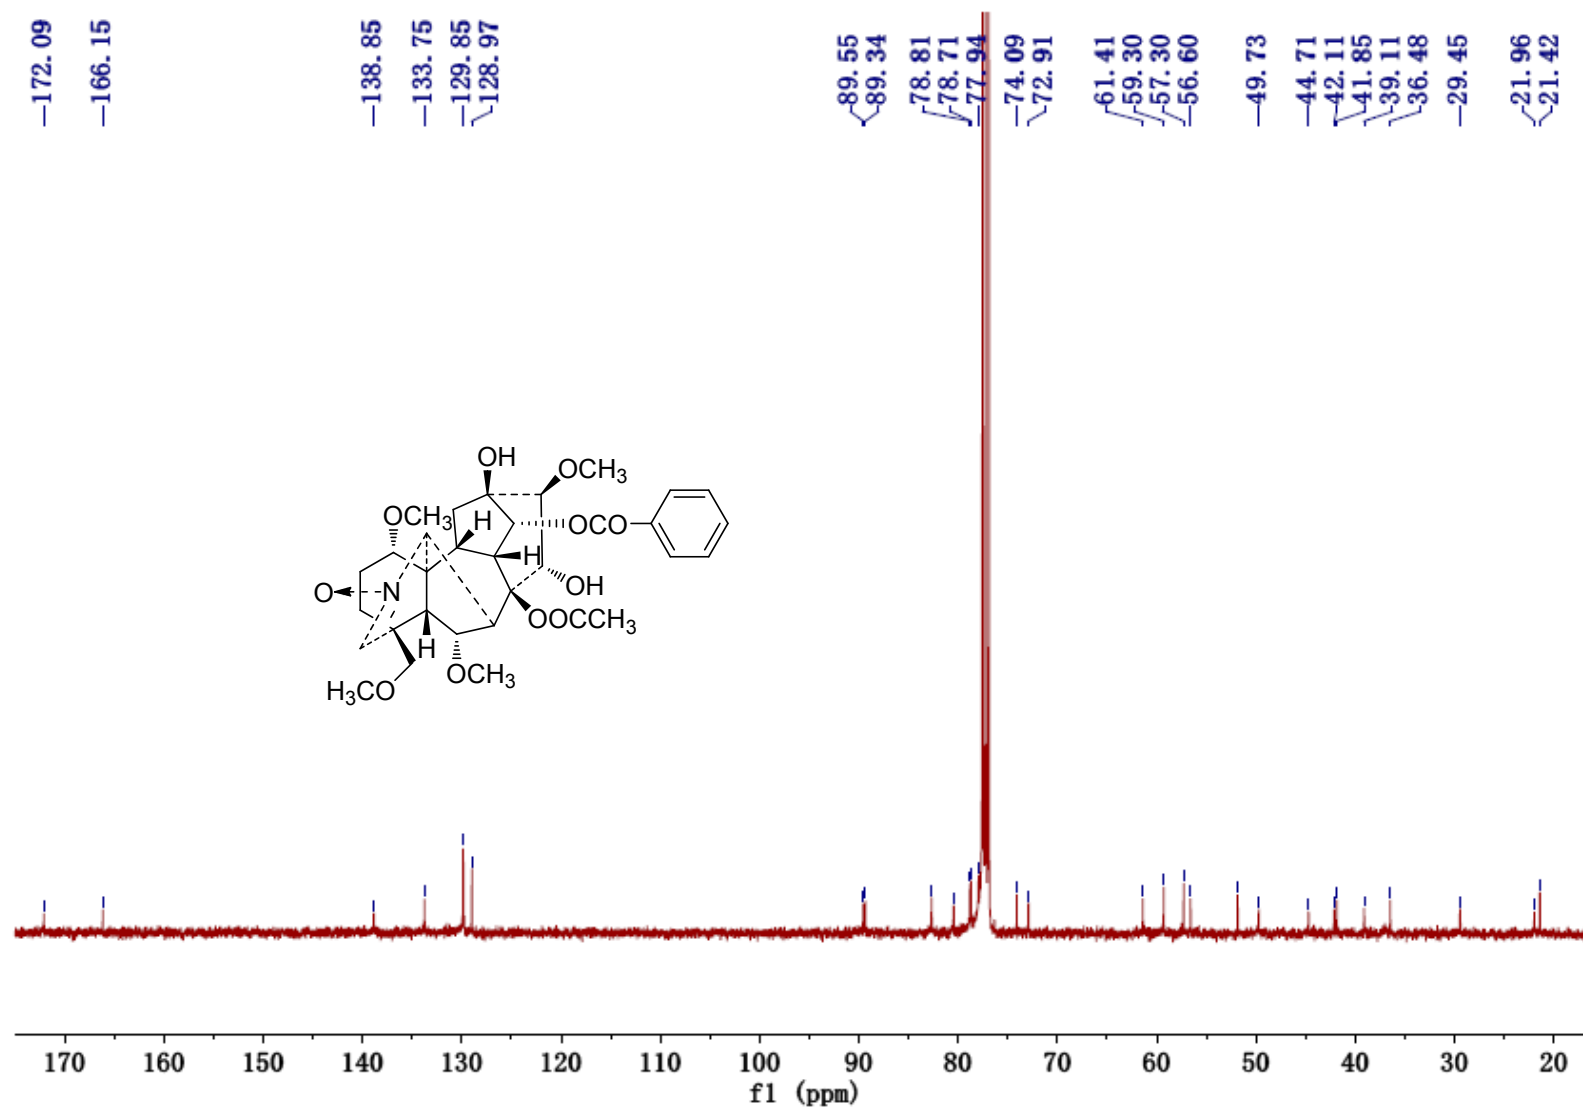Figure S12. The <sup>13</sup>C-NMR spectrum of 2 (100MHz in CDCl<sub>3</sub>).

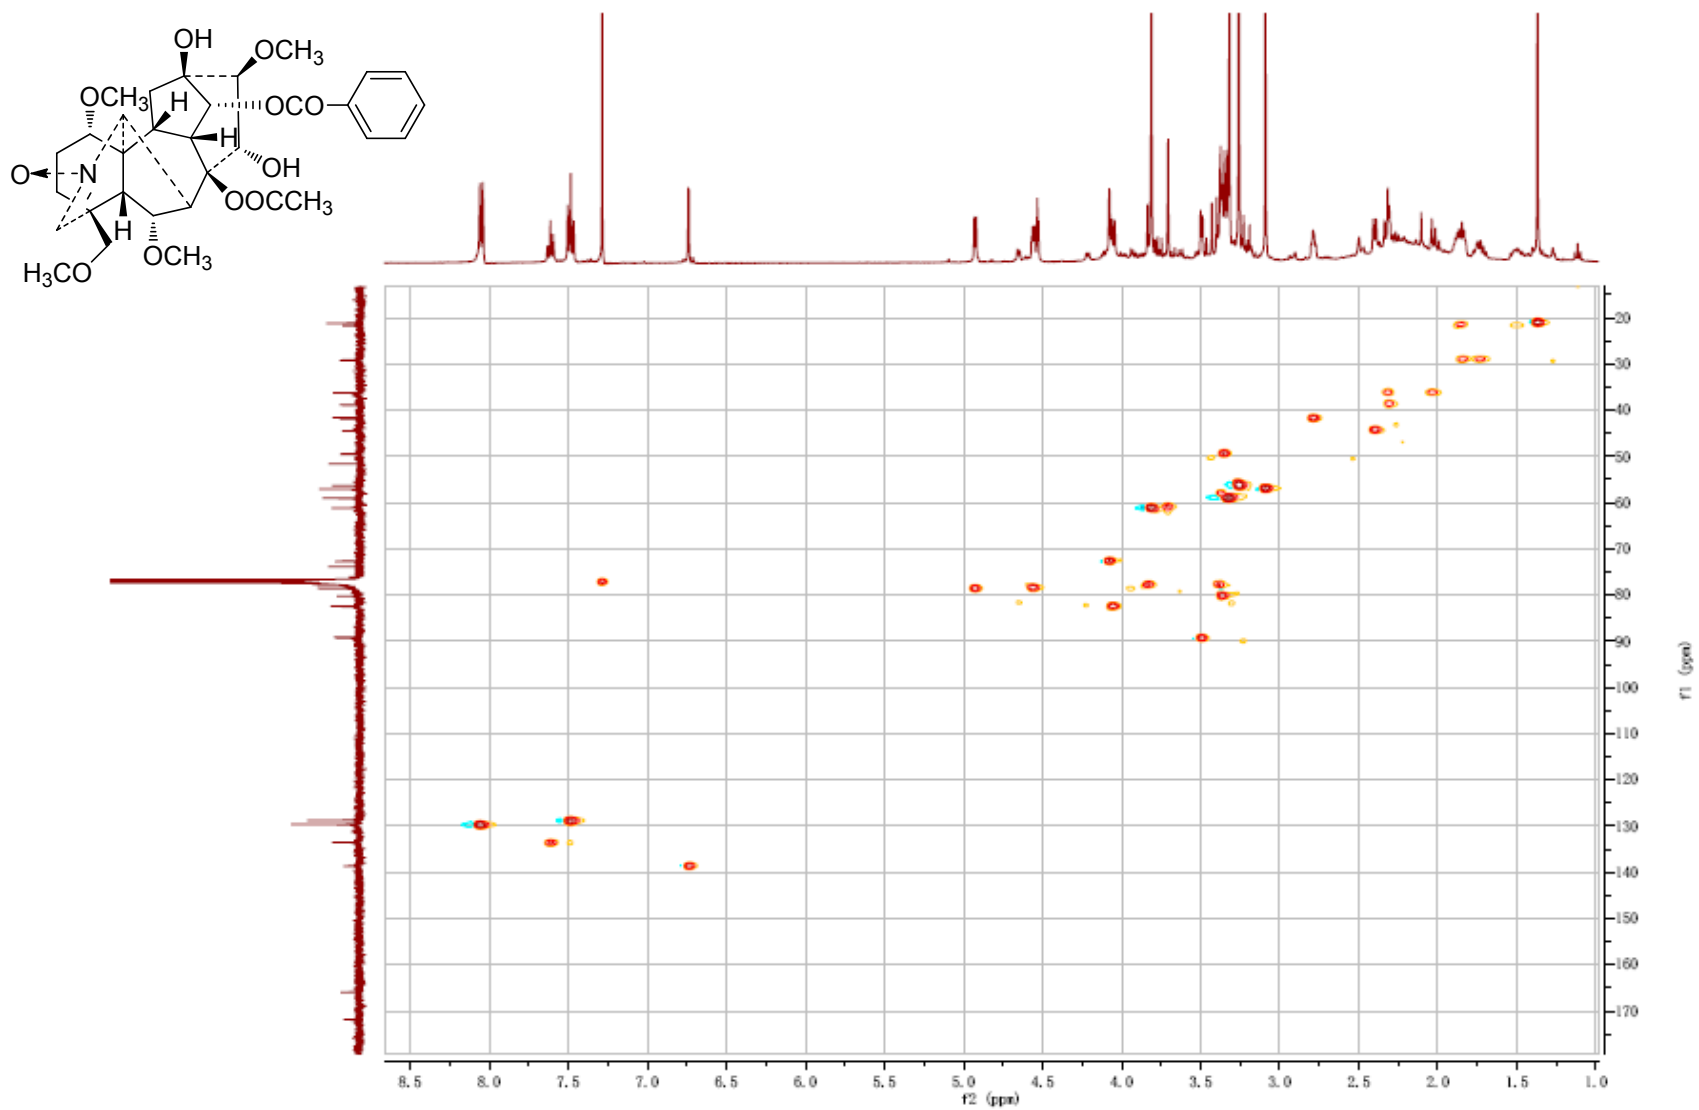

Figure S13. The HSQC spectrum of 2 (400MHz in CDCl<sub>3</sub>).

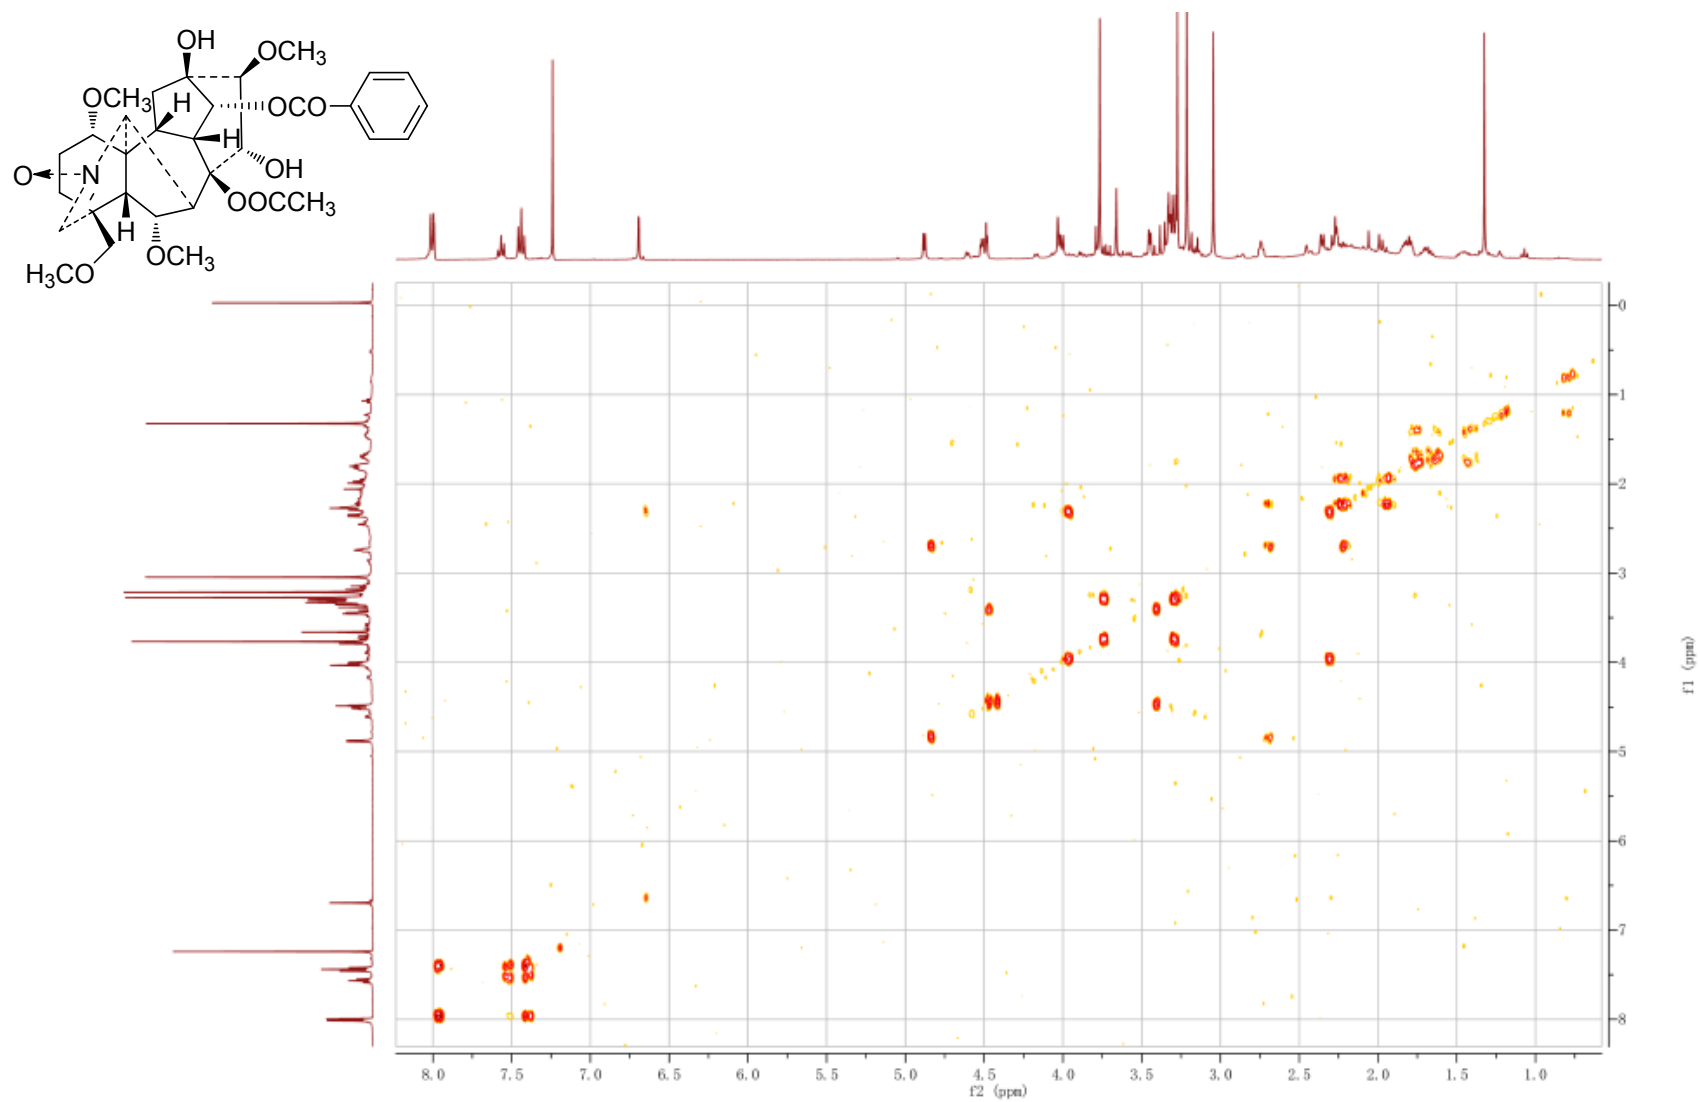

Figure S14. The  $^1\text{H}$ - $^1\text{H}$  COSY spectrum of 2 (400MHz in  $\text{CDCl}_3$ ).

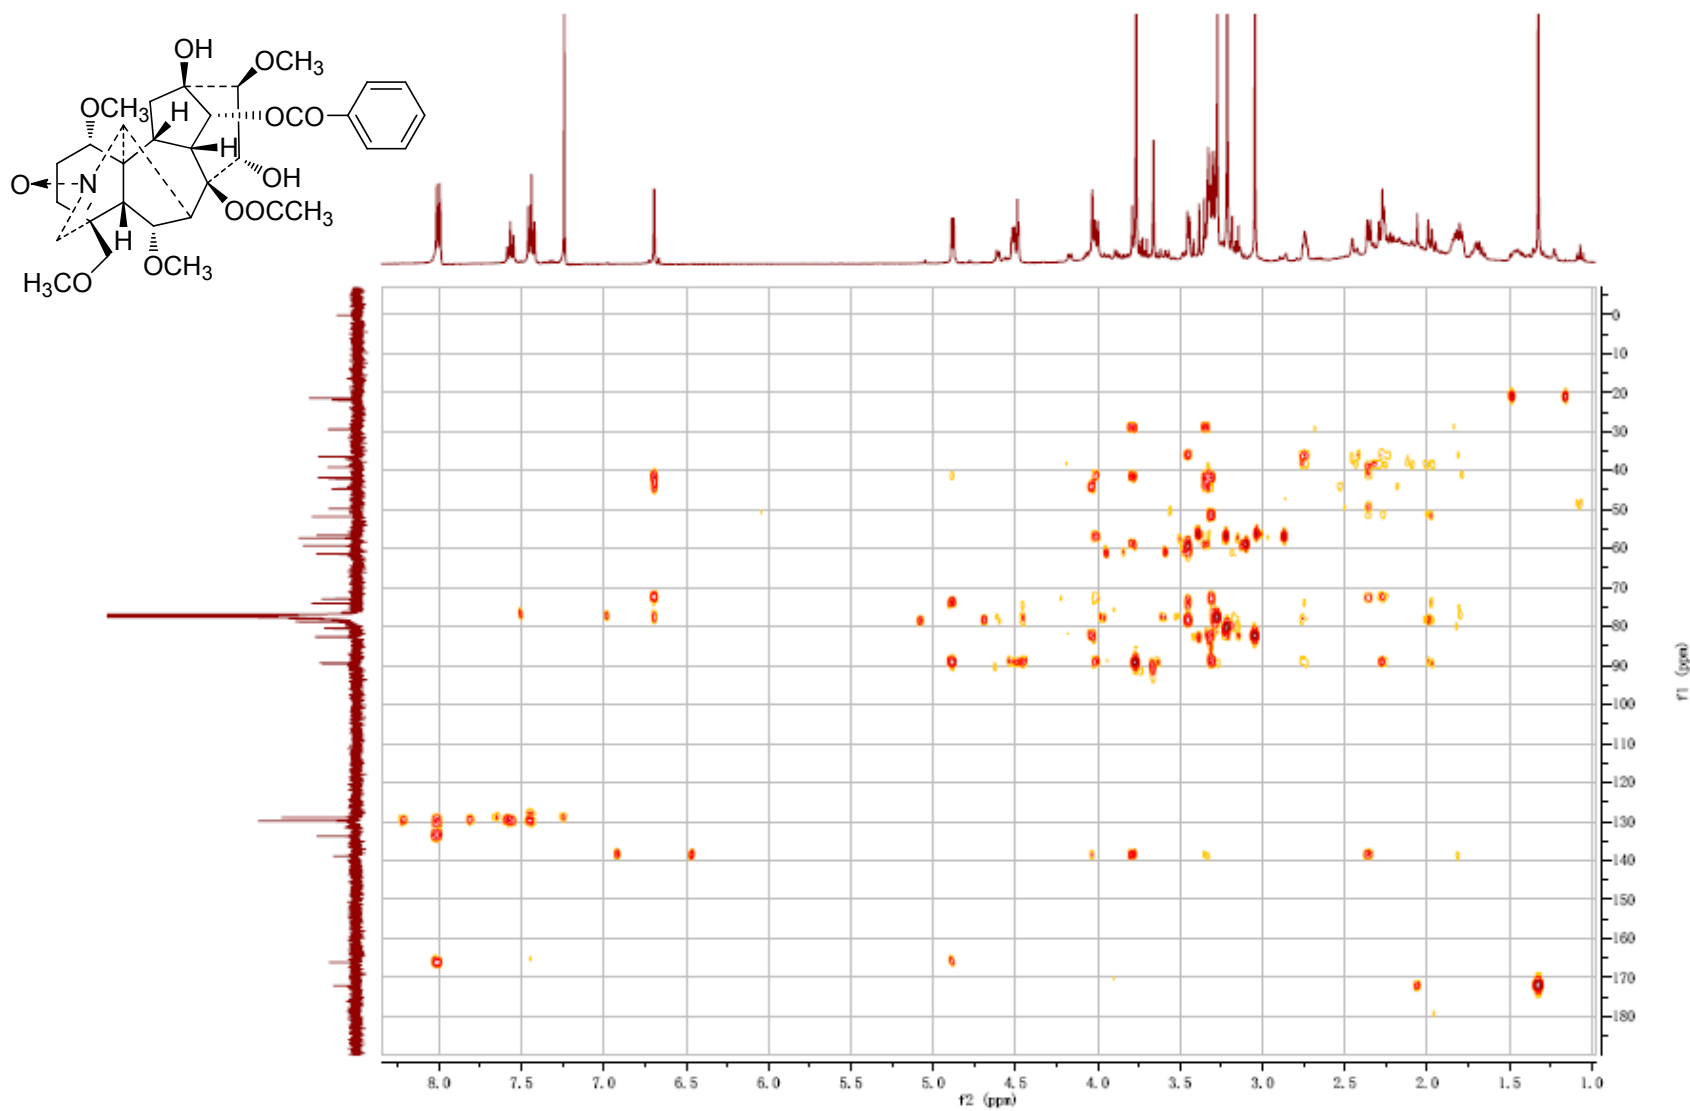

Figure S15. The HMBC spectrum of 2 (400MHz in CDCl<sub>3</sub>).



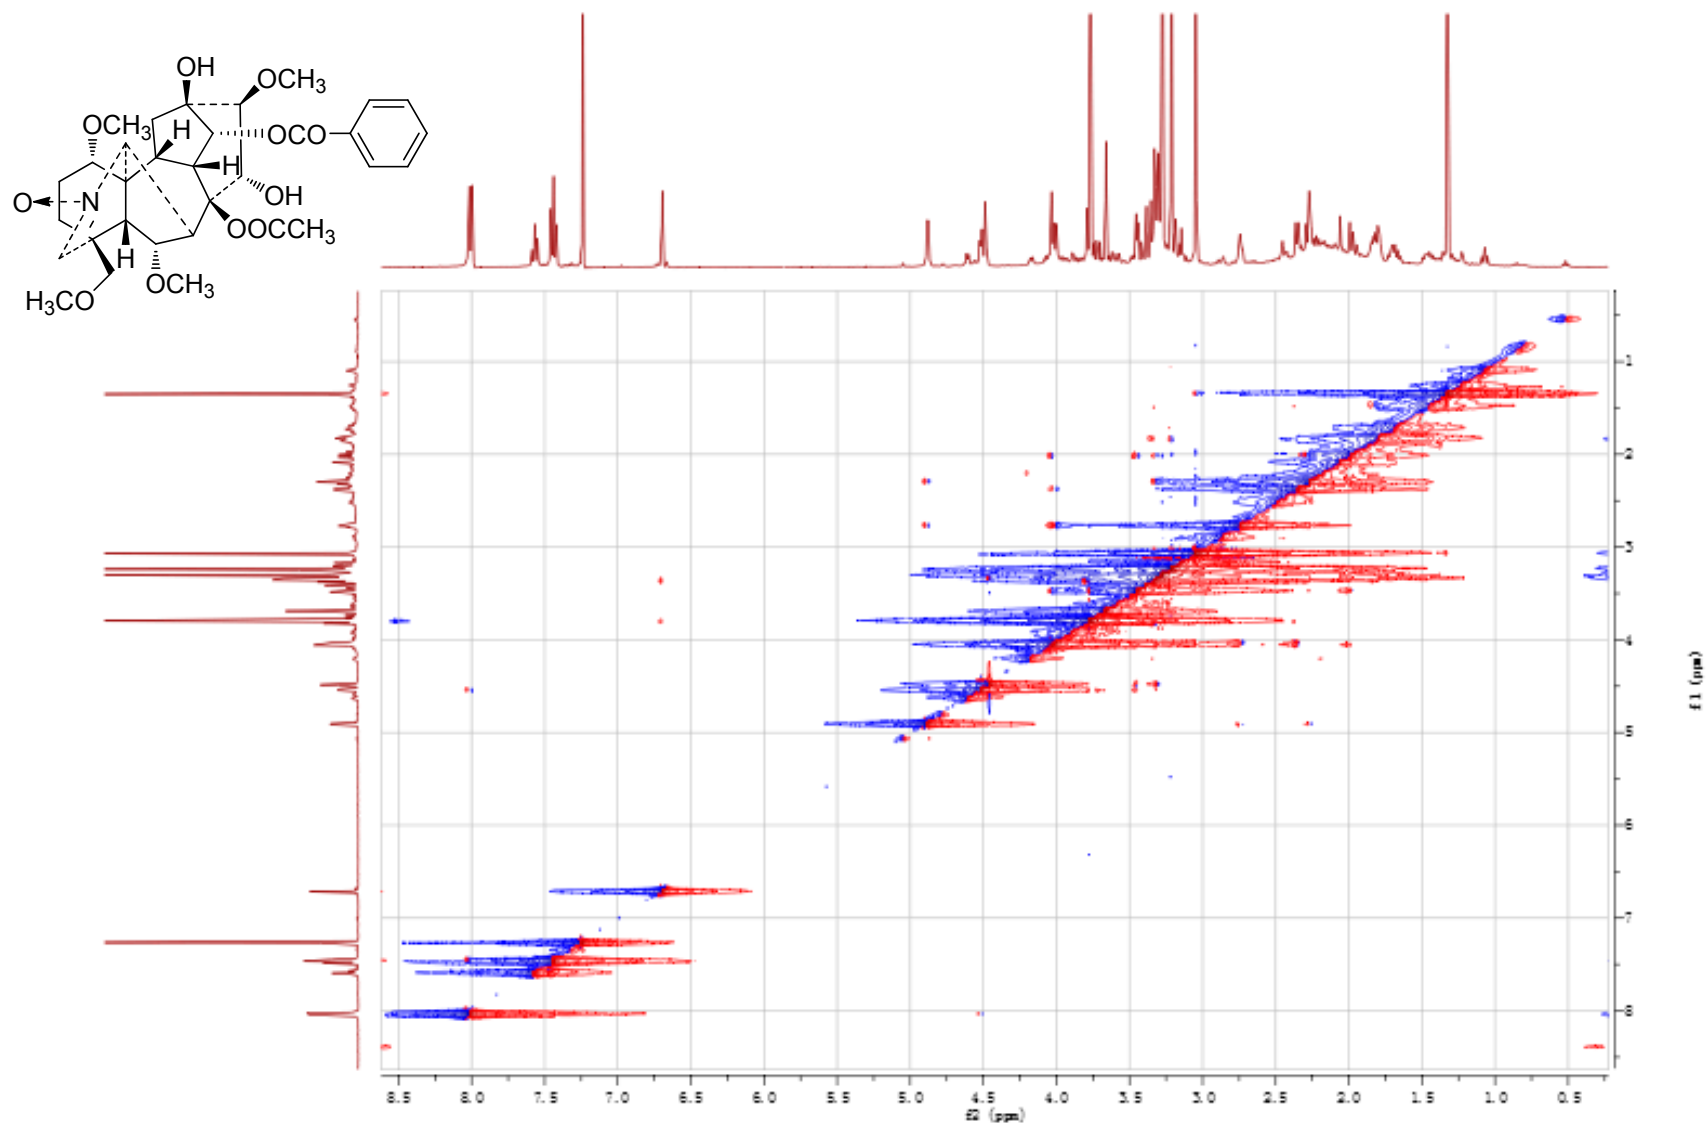

Figure S16. The ROESY spectrum of 2 (400MHz in CDCl<sub>3</sub>).

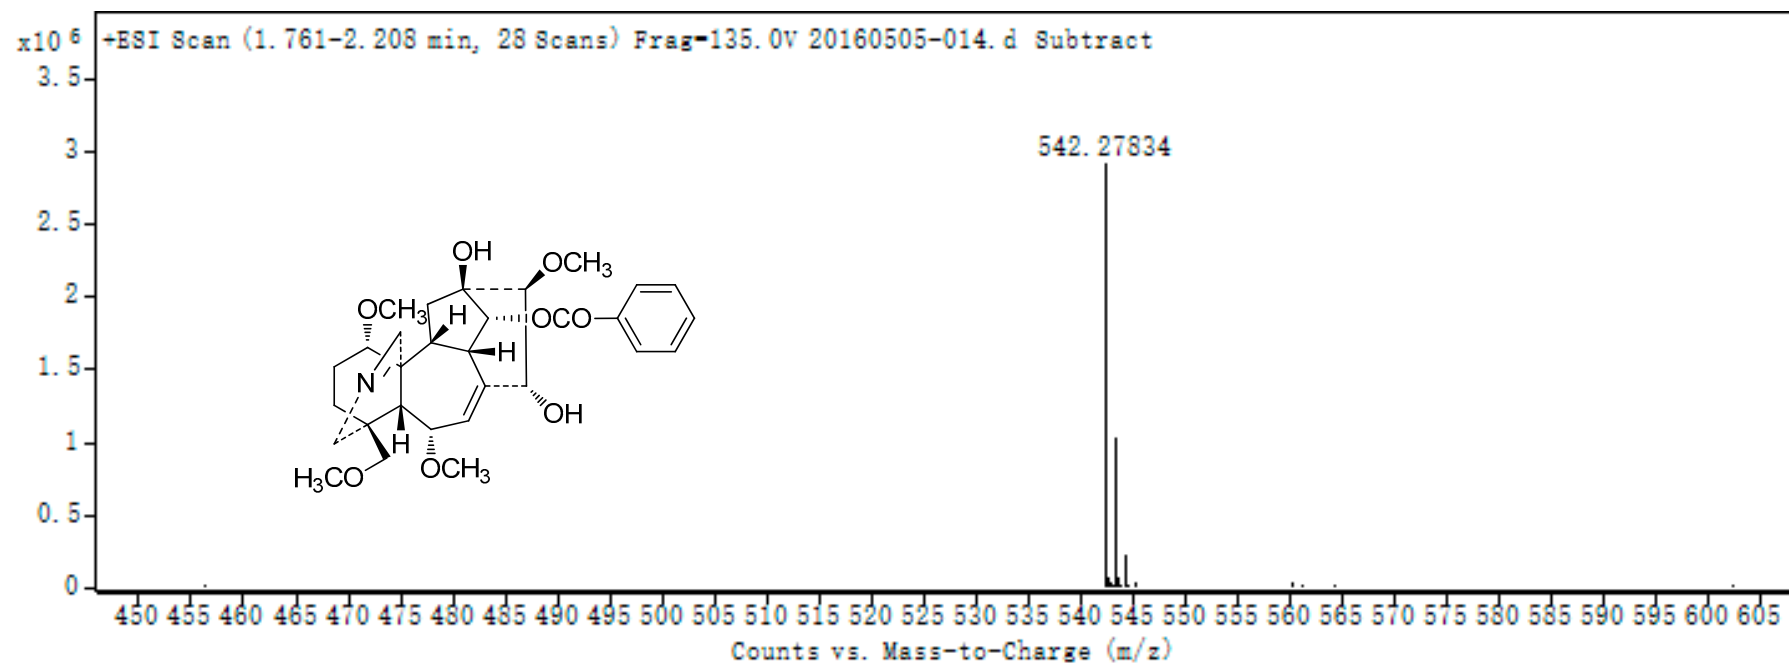

Figure S17. The HR-ESI-MS spectrum of 3 (in MeOH).

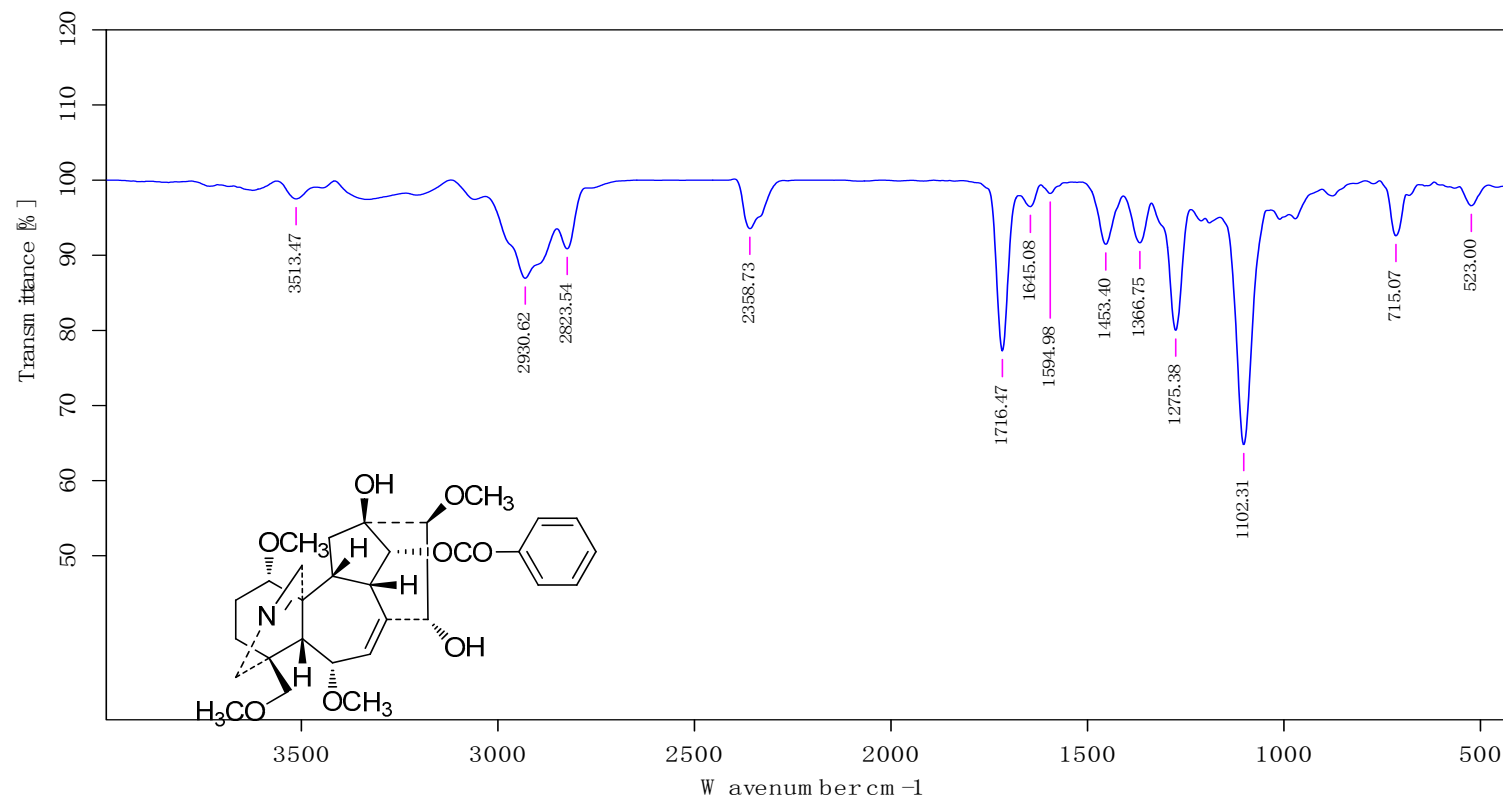

E:\W F\w 3.0

kbr

Instrument type and /or accessory

2016-5-10

Figure S18. The IR spectrum of 3 (in KBr).

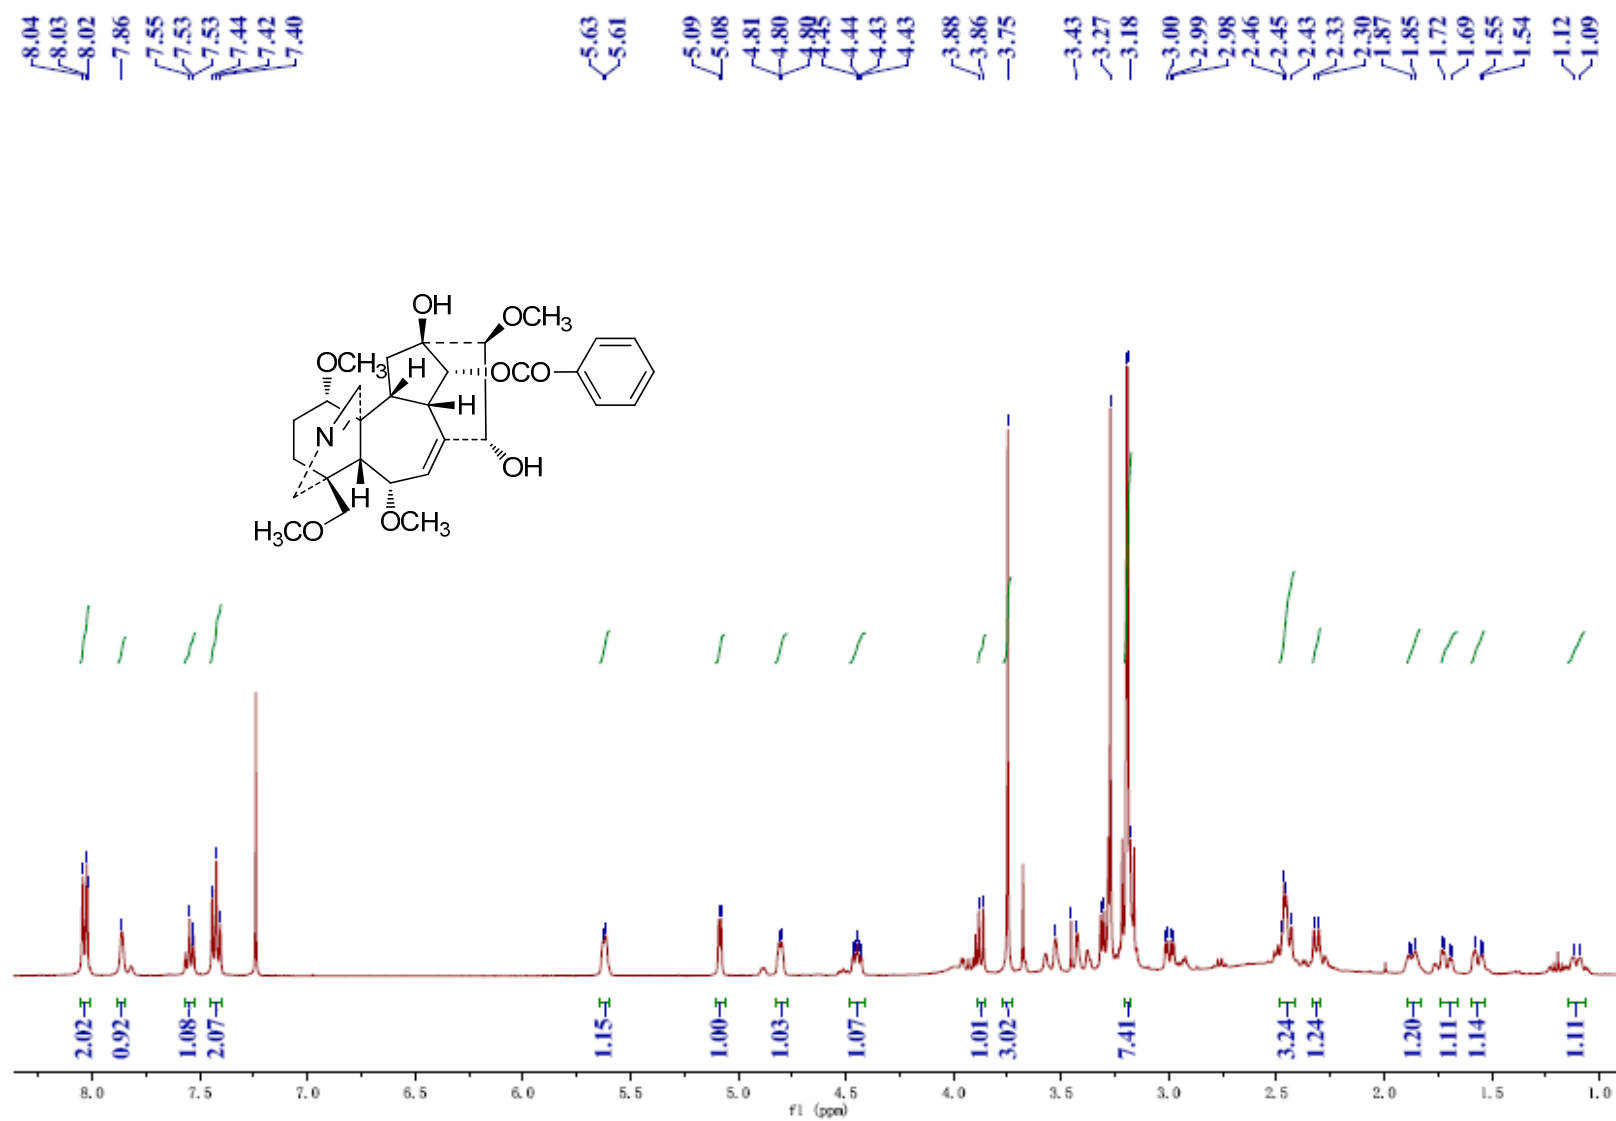Figure S19. The <sup>1</sup>H-NMR spectrum of 3 (400MHz in CDCl<sub>3</sub>).

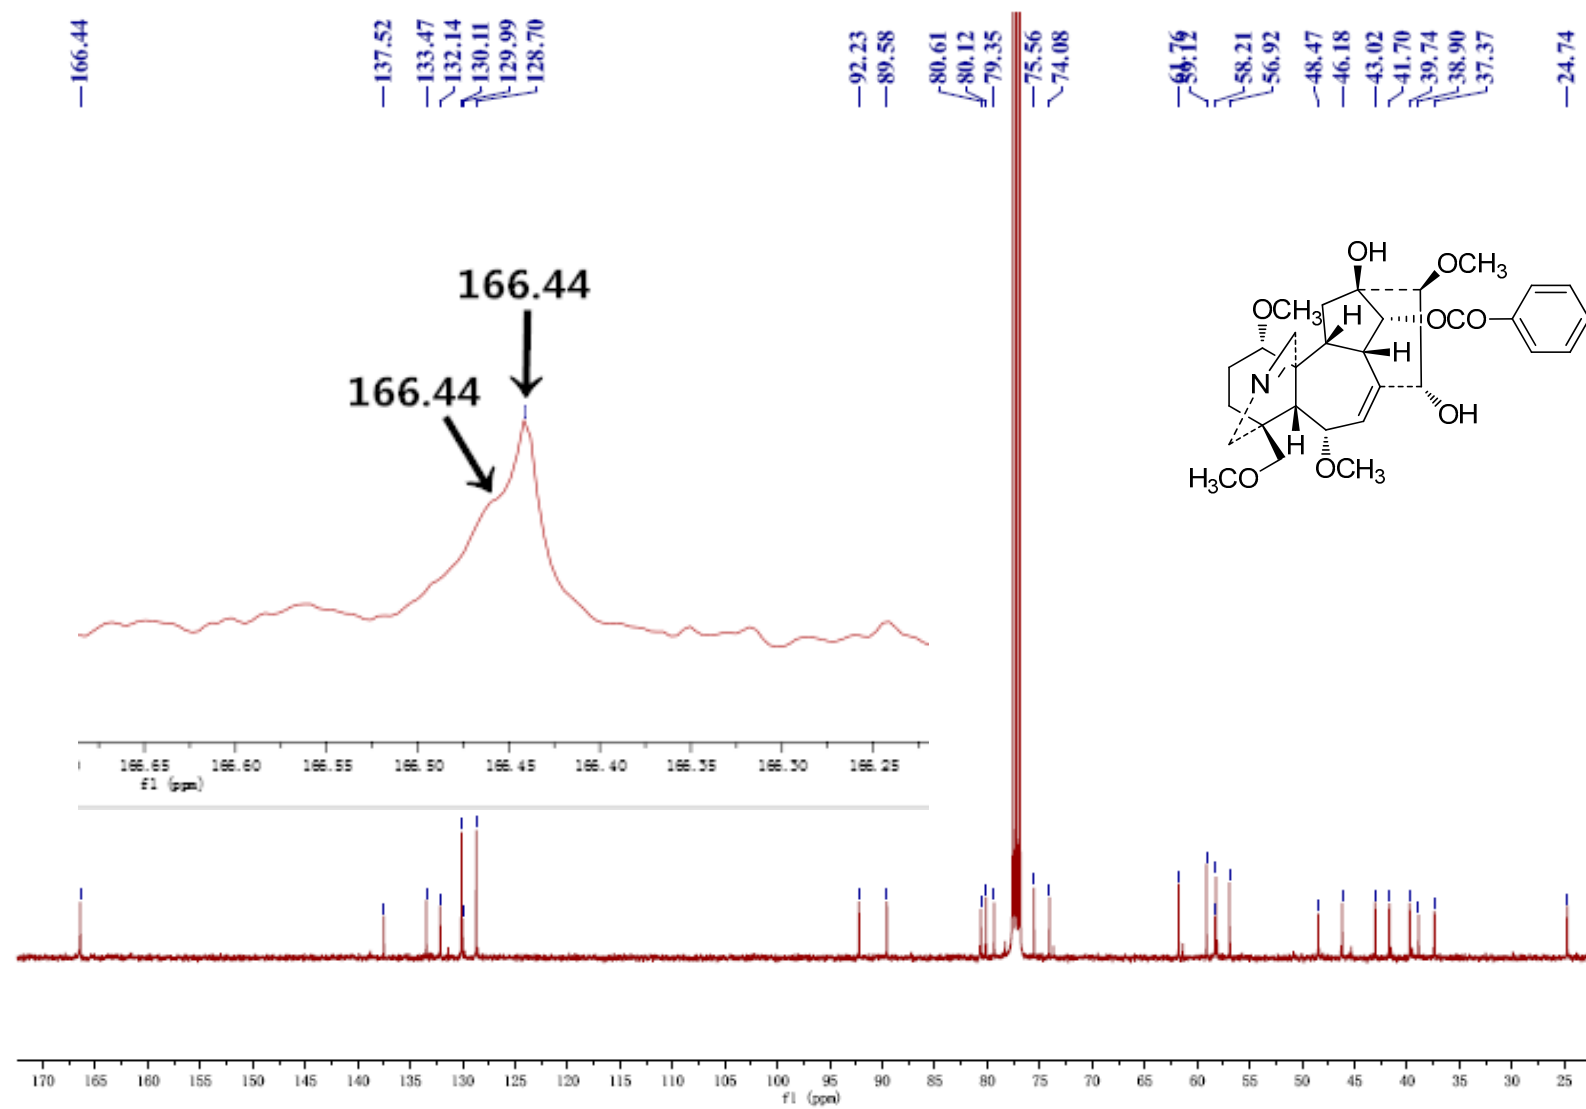Figure S20. The  $^{13}\text{C}$ -NMR spectrum of **3** (100MHz in  $\text{CDCl}_3$ ).

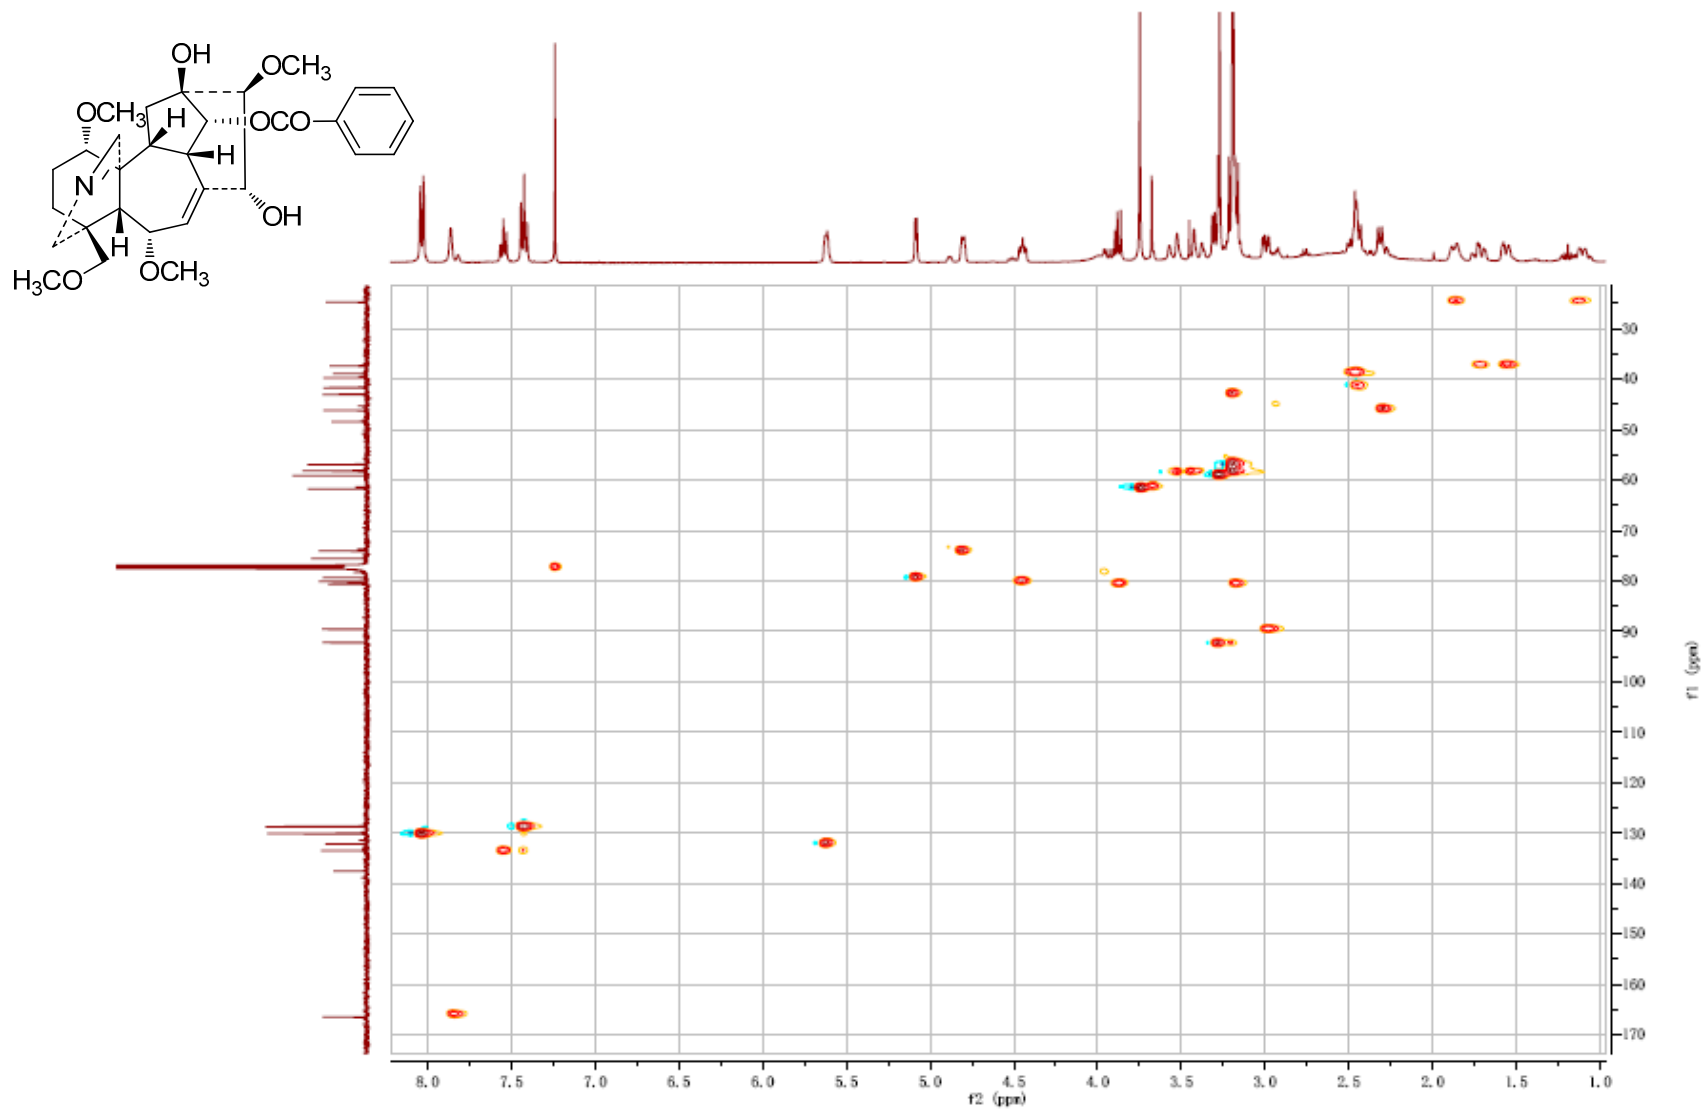

Figure S21. The HSQC spectrum of 3 (400MHz in CDCl<sub>3</sub>).

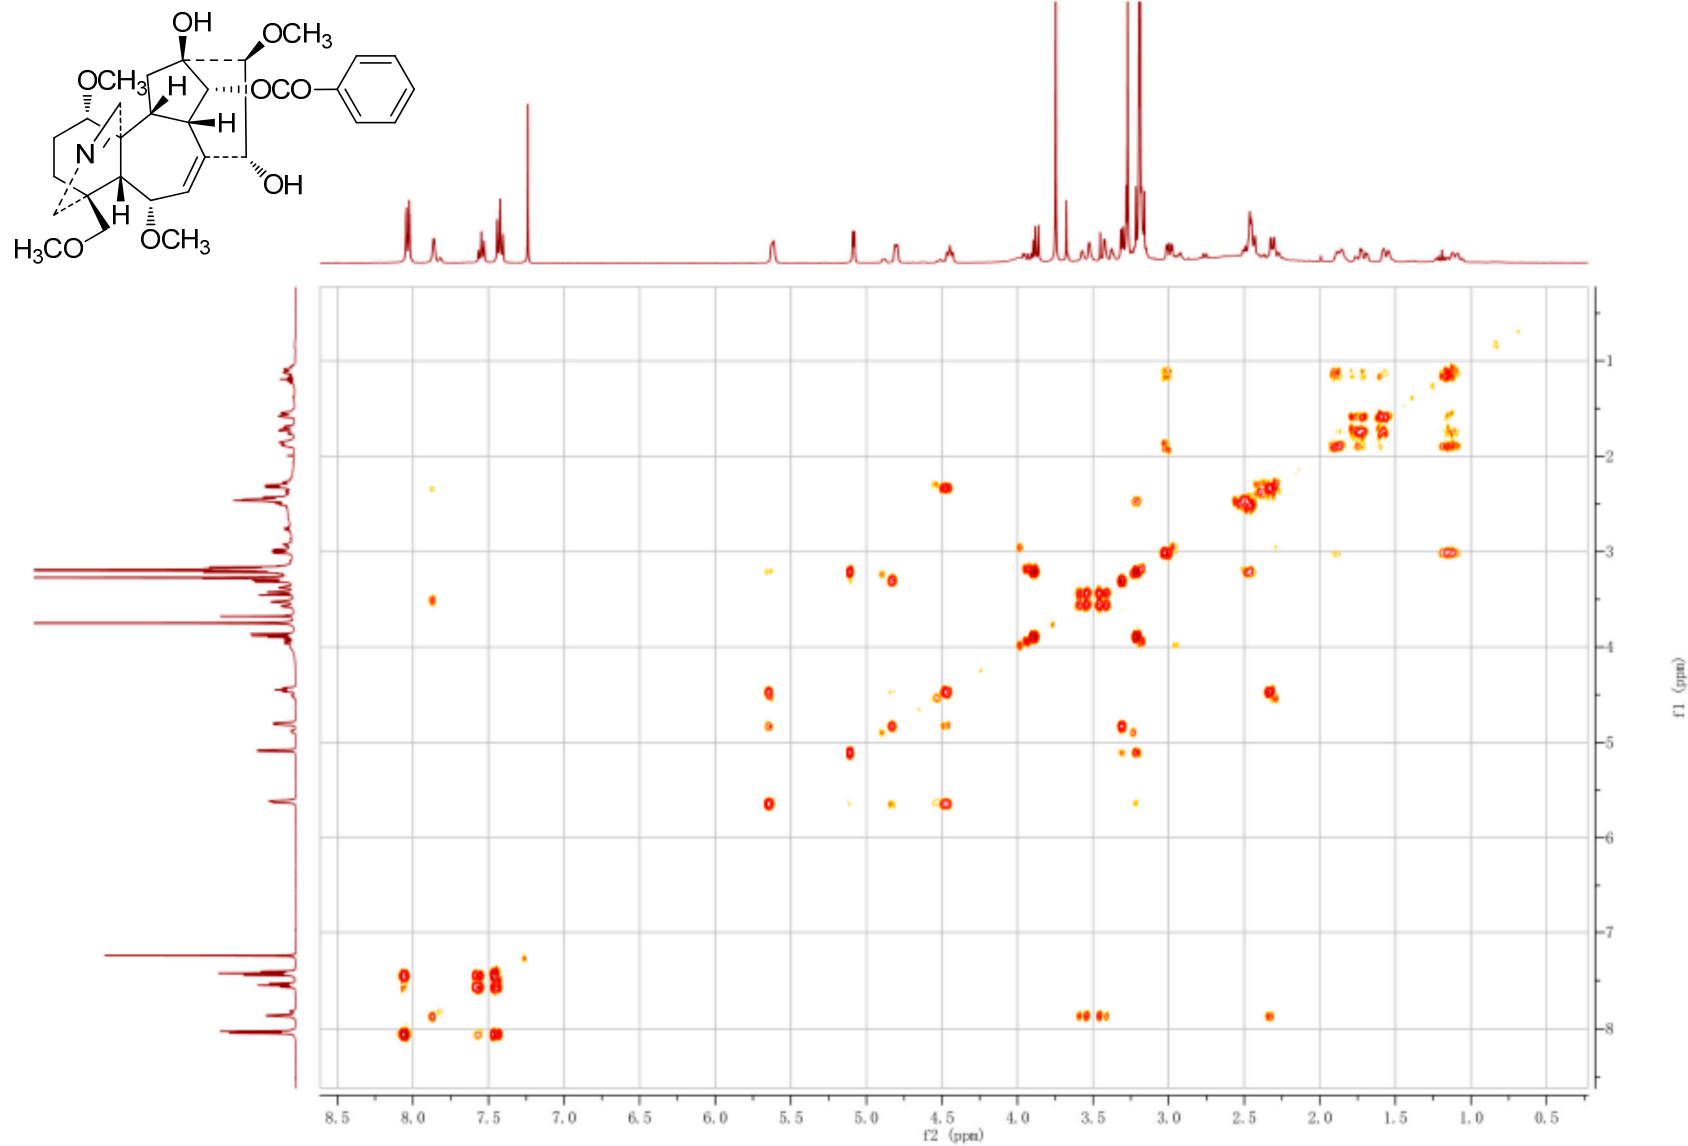

Figure S22. The  $^1\text{H}$ - $^1\text{H}$  COSY spectrum of 3 (400MHz in  $\text{CDCl}_3$ ).

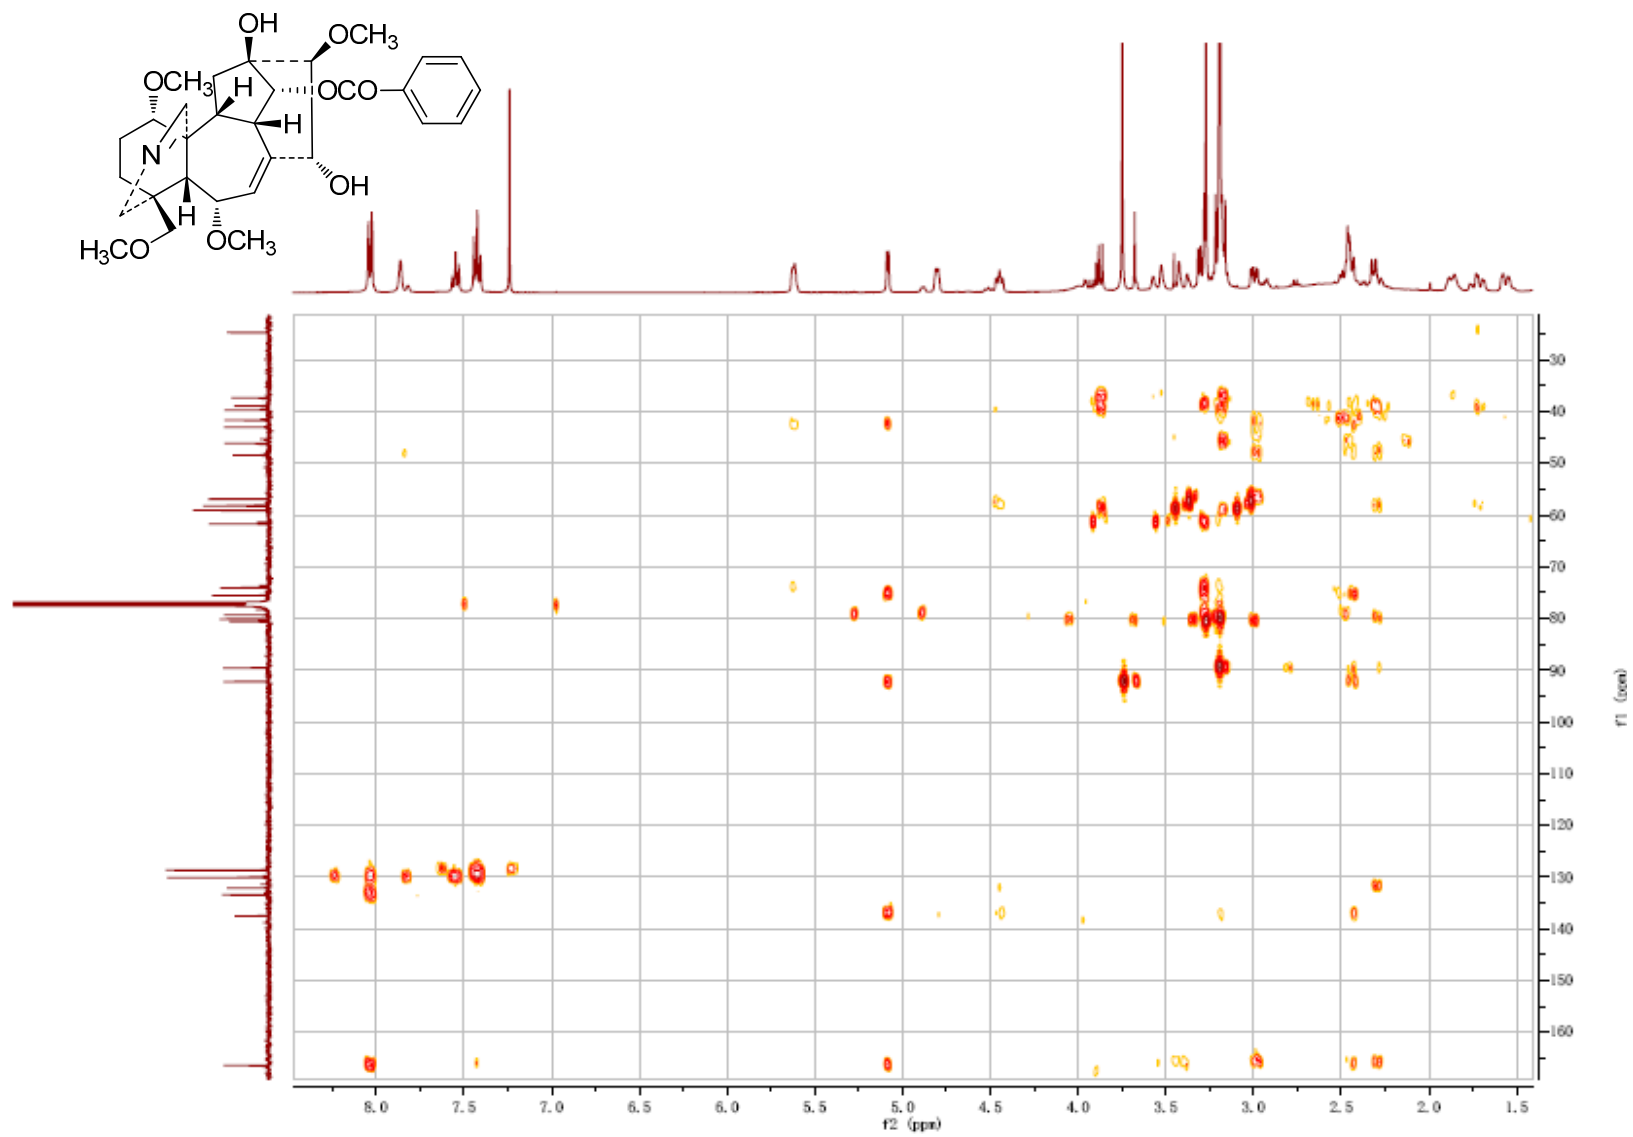Figure S23. The HMBC spectrum of 3 (400MHz in CDCl<sub>3</sub>).



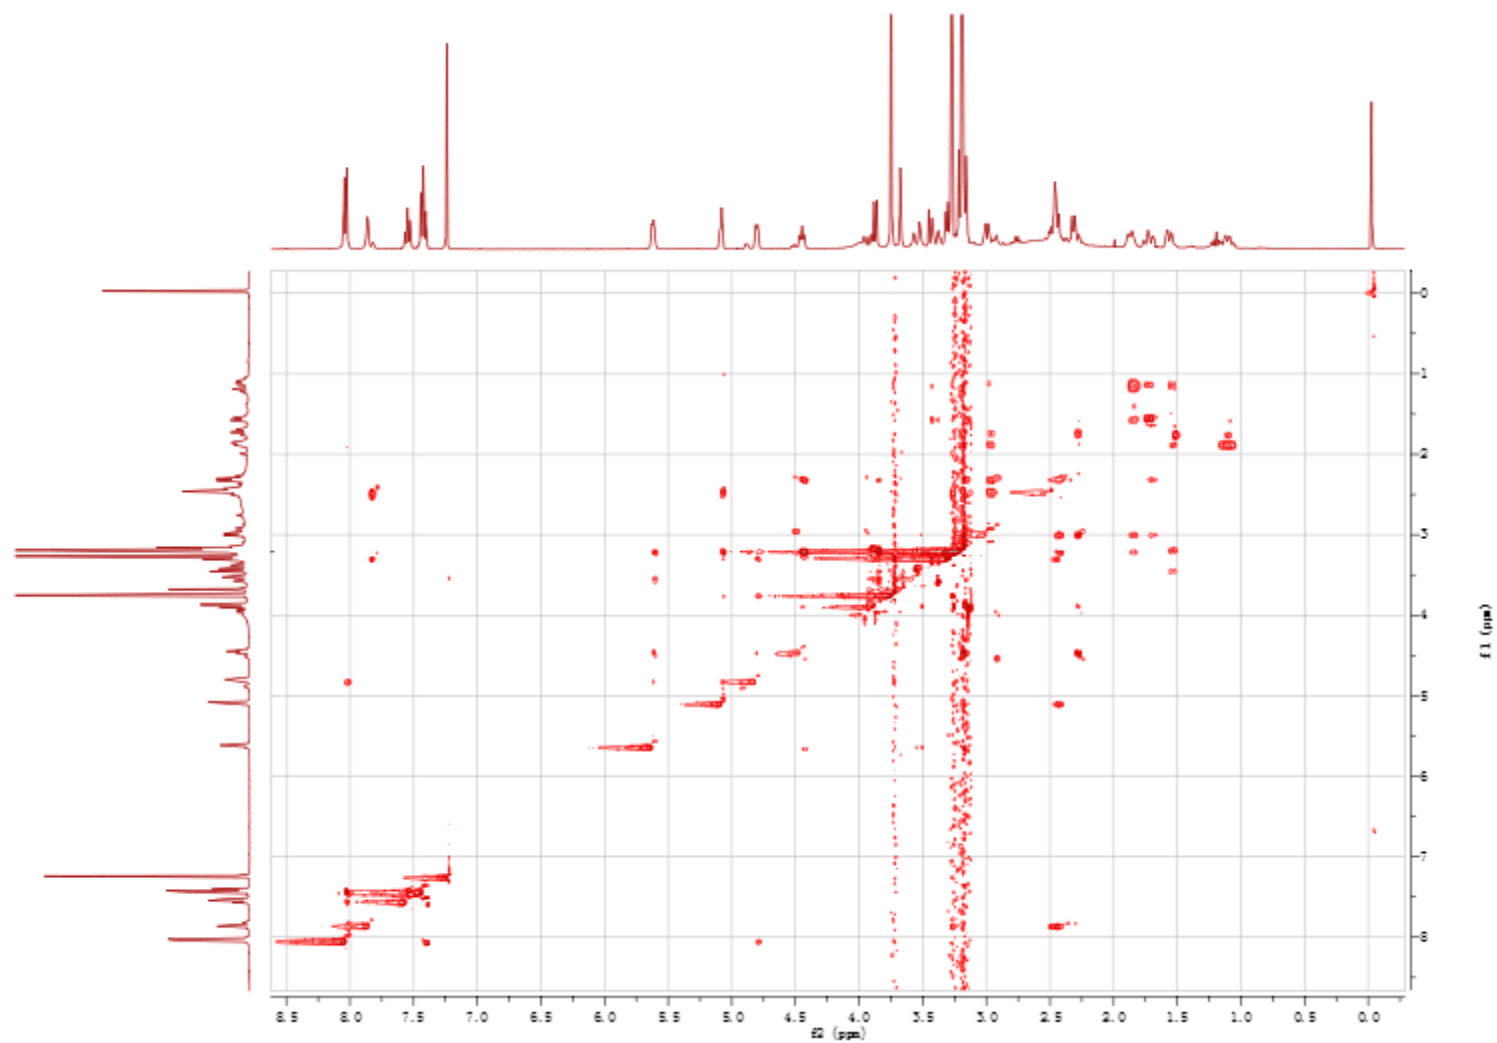

Figure S24. The ROESY spectrum of 3 (400MHz in CDCl<sub>3</sub>).
